# Supplementary material for: Hyperglycaemia in Pregnancy and Anthropometric Parameters in the Offspring at 10 Years: A Community-Based Retrospective Cohort Study in Sri Lanka
Source: J Obes. 2020 Jun 25;2020:2735148. doi: 10.1155/2020/2735148 (PMC7350072; doi:10.1155/2020/2735148)
Supplement: Supplementary Materials — Dataset. [file 2735148.f1.xlsx]

## Sheet: HIP and offspring adiposity at 
SerialNo	Identificationno	DOB	ChildAgeYrs	MotherAge	Exposurestatus	MaternalBMI	Parity	BirthWt	Sex	Ethnicity	Religion	MotherEdu	FatherEdu	Income	ExclusiveBF	DurationEBF	Weight	Height	HeightZScore	BMI	BMIPercentile	BMIZScore	WaistCircum	WaistPercentile	TricepsSkinfold	IndianTricepsSkinfoldPercentile	TypeExposure	DeliveryPOA	CategoryPOA	DeliveryMode	BirthWeightRec	AgeAtPregnancy	ExclusiveBreastFeedingRec	DaysLastWeek_physically_active	DaysGenerally_physically_active	AverageDays_physically_active	CompositePhysicalActivity	DichotomousPhysicalActivity	BMIZScoreRec	IndianTricepsRec	WaistPercentileRec	TSFTRec2	CohortOverweightRec	CohortWCRec	CohortObesityRec	DietaryEnergyFinal	EthnicityDichotomized	RecIncome	RecParity
324	8-03-40-E	2005-08-03	10.9167	49	1	4	2	3.3	1	1	1	5	5	4	1	2	32.3	138.6	-0.65	16.8	47.7	-0.06	61.4	1	12.4	5	1	38	1	3	0	38	1	7	0	3.5	3.5	1	2	3	1	2	2	2	2	1632	1	2	2
152	4-11-01-E	2005-05-28	10.9167	40	1	2	1	3.5	2	1	1	5	5	5	1	6	32.4	149.1	0.66	14.6	6.9	-1.48	56.8	1	10	4	1	38	1	1	1	29	0	7	7	7	7	2	2	2	1	2	2	2	2	1454	1	1	1
97	4-08-01-E	2005-10-05	10.5833	29	1	2	1	2.93	2	1	1	4	3	5	1	6	25.4	132.1	-1.58	14.6	8.4	-1.38	55.4	1	14.4	5	1	39	1	1	0	18	0	7	7	7	7	2	2	3	1	2	2	2	2	1327	1	1	1
52	1-23-01-E	2005-04-20	11	47	1	4	2	3.406	2	1	1	4	6	5	1	6	31.4	142	-0.5	15.6	19	-0.88	52.4	1	12.4	4	1	40	1	3	0	36	0	7	7	7	7	2	2	2	1	2	2	2	2	1353	1	1	2
396	8-03-92-E	2005-10-27	11.0833	42	1	4	4	3.75	2	1	1	4	4	4	1	5	53.1	145.2	-0.11	25.2	98.8	2.25	83	6	16.3	5	2	37	1	3	1	31	0	0	0	0	0	1	4	3	3	2	1	1	1	3398	1	2	2
69	1-10-02-E	2005-04-09	11	50	1	3	2	3.2	1	1	1	4	3	4	1	6	30.4	138.05	-0.81	16	27.6	-0.6	56.8	1	10.2	4	1	40	1	3	0	39	0	0	0	0	0	1	2	2	1	2	2	2	2	#NULL!	1	2	2
357	2-04-01-E	2005-02-09	11.4167	45	1	3	2	2.7	2	1	1	3	3	5	1	6	51.4	146.3	-0.25	24	97.4	1.94	72.3	3	17	7	2	36	2	3	0	34	0	7	7	7	7	2	3	4	2	1	1	2	2	1220	1	1	2
376	2-14-02-E	2005-04-16	11.25	46	1	3	1	2.865	1	1	1	4	4	3	1	6	55.5	150.5	0.84	24.5	99.1	2.34	84.8	6	19.2	8	1	37	1	1	0	35	0	2	3	2.5	2.5	1	4	5	3	1	1	1	1	1449	1	2	1
266	7-01-04-E	2005-05-31	11.0833	43	1	3	6	3.25	1	1	1	5	5	4	1	6	47	149	0.78	21.2	94.9	1.63	74.9	5	20.2	8	1	39	1	1	0	32	0	2	2	2	2	1	3	5	3	1	1	1	2	1242	1	2	2
244	7-01-09-E	2005-12-22	10.5	42	1	2	2	3.36	1	1	1	4	5	4	1	6	29.25	140	-0.1	14.9	12.5	-1.15	54.2	1	6.2	3	2	38	1	3	0	31	0	7	2	4.5	4.5	1	2	1	1	2	2	2	2	1196	1	2	2
80	1-12-01-E	2005-04-19	11	42	1	4	3	3	2	1	1	2	3	3	2	0	35.5	143.6	-0.26	17.4	52.3	0.06	60.8	1	14	5	1	40	1	1	0	31	1	2	1	1.5	1.5	1	2	3	1	2	2	2	2	#NULL!	1	2	2
407	5-09-31-E	2005-02-04	11.5833	36	1	2	2	2.8	2	1	1	3	4	4	1	6	41.75	153.4	0.68	17.7	51	0.03	67.4	2	11.4	4	1	38	1	3	0	25	0	7	3	5	5	2	2	2	2	2	2	2	2	1714	1	2	2
11	1-13-07-E	2005-11-02	11.1667	47	1	3	2	3.25	2	1	1	8	8	4	1	6	22.5	133.25	-1.94	12.7	0.2	-3.09	56.7	1	8.7	3	1	42	1	3	0	36	0	6	2	4	4	1	1	1	1	2	2	2	2	1310	1	2	2
229	5-08-01-E	2005-02-03	11.3333	49	1	4	2	2.9	2	1	1	5	5	4	1	6	30.8	144.55	-0.41	14.7	6.5	-1.51	55.5	1	8.2	3	1	37	1	3	0	38	0	7	7	7	7	2	2	1	1	2	2	2	2	1248	1	2	2
205	6-03-02-E	2005-02-22	11.25	34	1	1	1	2.95	2	1	1	4	4	4	1	6	27.4	127.5	-2.9	16.9	38.8	-0.28	59.8	1	17.2	7	1	38	1	1	0	23	0	3	0	1.5	1.5	1	2	4	1	1	2	2	2	747	1	2	1
237	6-02-04-E	2005-11-01	10.5833	39	1	4	3	1.9	2	1	1	4	5	3	1	0	38.05	148.4	0.11	16.8	36.9	-0.33	63	1	12.2	4	1	35	2	1	0	28	1	7	7	7	7	2	2	2	1	2	2	2	2	1372	1	2	2
238	6-02-03-E	2005-11-01	10.5833	39	1	4	3	2.05	2	1	1	4	5	3	1	0	41.9	148.6	0.9	19	47	-0.08	67.7	2	14.2	5	1	35	2	1	0	28	1	7	7	7	7	2	2	3	2	2	2	2	2	#NULL!	1	2	2
174	3-01-01-E	2005-11-15	10.5	45	1	3	1	3.015	1	1	1	4	1	2	1	6	35.6	130	-1.62	21.1	96	1.75	70.5	3	12.5	5	1	38	1	3	0	34	0	7	6	6.5	6.5	2	3	3	2	2	1	2	2	1296.33	1	2	1
384	2-09-05-E	2005-03-08	11.4167	34	1	3	1	3.2	1	1	1	4	4	2	1	6	27.8	139.15	-0.92	14.4	3.1	-1.87	53.5	1	8.6	4	1	38	1	1	0	23	0	5	4	4.5	4.5	1	2	2	1	2	2	2	2	1871	1	2	1
206	5-02-01-E	2005-04-27	11.0833	44	1	4	2	3.7	2	1	1	3	3	4	1	6	35.4	136.5	-1.4	19	74.8	0.67	61.6	1	10.4	4	1	38	1	3	1	33	0	6	6	6	6	2	2	2	1	2	2	2	2	#NULL!	1	2	2
84	1-10-03-E	2005-07-27	10.75	35	1	3	3	3.6	2	3	3	4	4	4	1	6	24.65	133.35	-1.55	13.9	2.6	-1.94	54.8	1	9.4	3	1	40	1	1	1	24	0	7	7	7	7	2	2	1	1	2	2	2	2	#NULL!	2	2	2
272	8-03-23-E	2005-12-22	10.5	42	1	2	2	3.28	1	1	1	9	5	6	1	4	39.1	149.5	1.32	17.5	65.7	0.41	64.2	2	10.8	5	1	37	1	1	0	31	0	3	0	1.5	1.5	1	2	3	2	2	2	2	2	1702.67	1	1	2
392	7-01-10-E	2005-09-04	10.9167	37	1	4	1	2.48	1	1	1	5	4	7	1	6	26.05	133.1	-1.47	14.7	7.4	-1.44	54.6	1	7.4	3	1	40	1	1	0	26	0	7	3	5	5	2	2	1	1	2	2	2	2	#NULL!	1	1	1
116	4-04-01-E	2005-07-22	10.75	35	1	4	2	3.48	1	1	1	5	4	5	1	6	28.45	144.1	0.3	13.7	1.2	-2.27	55.7	1	5.3	2	1	35	2	3	0	24	0	7	7	7	7	2	1	1	1	2	2	2	2	1683	1	1	2
408	8-03-99-E	2005-11-30	10.75	44	1	2	2	2.9	2	1	1	4	5	6	1	6	21.4	126.15	-2.66	13.4	1.1	-2.28	53.7	1	7.8	3	1	38	1	3	0	33	0	4	2	3	3	1	1	1	1	2	2	2	2	886	1	1	2
399	2-03-20-E	2005-08-15	11	35	1	2	1	3.75	1	1	1	5	5	4	1	6	27.4	134.7	-1.28	15.1	12.2	-1.16	52.5	1	9.8	4	1	38	1	3	1	24	0	3	3	3	3	1	2	2	1	2	2	2	2	1484	1	2	1
350	2-02-03-E	2005-01-13	11.5	40	1	2	1	3.5	1	1	1	4	4	1	1	4	32	137.5	-1.62	16.9	37	-0.33	59.8	1	17	7	1	38	1	3	1	29	0	1	1	1	1	1	2	4	1	1	2	2	2	1092	1	2	1
278	7-01-06-E	2005-09-23	10.75	45	1	2	2	4.7	1	1	1	5	5	7	1	3	53.5	156.5	2.16	21.8	97.1	1.9	69.4	3	28	9	1	38	1	3	1	34	1	7	7	7	7	2	3	5	2	1	1	2	2	#NULL!	1	1	2
34	1-07-03-E	2006-01-25	10.1667	51	1	3	2	2.2	2	1	1	2	3	3	2	0	35.6	143.5	0.56	17.3	60.2	0.26	65.9	2	13.2	5	2	35	2	3	0	40	1	4	2	3	3	1	2	3	2	2	2	2	2	#NULL!	1	2	2
378	2-20-02-E	2005-09-13	10.8333	45	1	4	3	2.4	2	1	1	4	4	4	1	6	26.3	127.2	-2.57	16.3	32.8	-0.45	59.8	1	11.2	4	2	40	1	3	0	34	0	7	7	7	7	2	2	2	1	2	2	2	2	#NULL!	1	2	2
400	2-08-01-E	2005-10-03	10.8333	39	1	2	1	2.46	2	1	1	8	4	5	1	6	63.8	161.2	2.54	24.8	98.6	2.19	76	5	17.2	7	1	39	1	1	0	28	0	5	4	4.5	4.5	1	4	4	3	1	1	1	1	1376	1	1	1
270	8-03-19-E	2005-03-28	11.25	50	1	4	2	2.52	1	1	1	5	4	6	1	6	57.2	147.4	0.38	26.3	99.6	2.68	79.5	6	24.2	9	1	38	1	3	0	39	0	0	0	0	0	1	4	5	3	1	1	1	1	#NULL!	1	1	2
374	2-21-01-E	2005-07-27	11	49	1	3	2	2.2	2	1	1	4	5	4	1	0	34.5	138.5	-0.99	18	62.4	0.31	70.7	3	15	5	1	37	1	3	0	38	1	7	7	7	7	2	2	3	2	2	2	2	2	1288	1	2	2
386	2-10-01-E	2005-07-06	11.0833	42	1	3	1	2.6	2	1	1	5	5	4	1	6	41.8	134.2	-1.73	23.2	96.9	1.86	73.7	4	19.6	8	1	36	2	3	0	31	0	3	1	2	2	1	3	5	2	1	1	2	2	1229	1	2	1
273	8-03-08-E	2005-06-21	10.6667	45	1	3	2	2.9	1	1	1	5	4	3	1	5	46.9	144.85	0.21	22.3	97.5	1.95	70.6	3	16.2	7	1	37	1	3	0	34	0	7	7	7	7	2	3	4	2	1	1	2	2	1243	1	2	2
372	2-02-01-E	2005-07-01	11.0833	39	1	3	3	3.6	2	1	1	3	3	2	1	3	33.9	136.9	-1.3	18.1	63.1	0.33	62.8	2	17.8	7	1	39	1	3	1	28	1	1	3	2	2	1	2	4	2	1	2	2	2	1161	1	2	2
242	7-01-05-E	2005-06-08	10.9167	48	1	4	2	2.5	2	1	1	8	8	7	1	6	33.2	140.2	-0.81	16.9	42.3	-0.2	62	1	16.2	5	1	37	1	3	0	37	0	3	3	3	3	1	2	3	1	2	2	2	2	#NULL!	1	1	2
122	4-03-03-E	2005-02-14	11.1667	44	1	4	2	2.6	1	1	1	5	5	5	1	5	21	130.5	-2.05	12.3	0.2	-3.78	48	1	#NULL!	#NULL!	2	38	1	3	0	33	0	5	5	5	5	2	1	#NULL!	1	#NULL!	2	2	2	#NULL!	1	1	2
23	1-02-04-E	2005-03-15	11	47	1	2	3	2.5	2	1	1	3	2	1	1	6	24.7	132.9	-1.88	14	2.6	1.95	56.2	1	10.3	4	1	40	1	3	0	36	0	7	7	7	7	2	3	2	1	2	1	2	2	1124	1	2	2
404	2-08-12-E	2005-07-16	11.1667	50	1	2	3	2.9	2	1	1	5	4	5	1	6	24.55	134.4	-1.76	13.6	1.1	-2.3	52.2	1	7.8	2	1	39	1	1	0	39	0	5	3	4	4	1	1	1	1	2	2	2	2	1033	1	1	2
271	8-03-07-E	2005-10-05	10.75	40	1	3	2	3.33	2	1	1	4	4	3	1	6	28.4	133.4	-1.54	16	28.4	-0.57	56.1	1	9	3	1	39	1	1	0	29	0	2	3	2.5	2.5	1	2	1	1	2	2	2	2	1904	1	2	2
217	5-04-01-E	2005-06-19	10.9167	42	1	3	2	1.76	2	1	1	2	4	4	1	6	78.2	136.95	-1.2	41.7	99.9	4.79	96.5	6	26.2	9	1	39	1	1	0	31	0	1	0	0.5	0.5	1	4	5	3	1	1	1	1	1384	1	2	2
102	4-03-02-E	2005-09-10	10.6667	52	1	4	2	2.66	1	1	1	3	3	2	1	4	31.25	135.2	-0.94	17.1	57.5	0.19	65	2	#NULL!	#NULL!	1	39	1	1	0	41	0	7	7	7	7	2	2	#NULL!	2	#NULL!	2	2	2	#NULL!	1	2	2
403	2-07-12-E	2005-11-19	10.75	36	1	2	1	2.9	2	1	1	5	4	5	1	6	44.8	140.85	-0.44	22.6	96.4	1.8	73.1	4	16.2	5	1	38	1	3	0	25	0	3	3	3	3	1	3	3	2	2	1	2	2	1272	1	1	1
360	2-20-01-E	2005-08-16	10.9167	39	1	3	2	3.7	1	1	1	4	4	1	1	6	40.1	140.1	-0.41	20.4	92.7	1.45	64.3	2	19	8	2	37	1	3	1	28	0	3	3	3	3	1	3	5	2	1	1	2	2	955	1	2	2
140	4-09-01-E	2005-05-08	11	41	1	4	1	2.8	2	1	1	7	6	5	1	6	22	126	-2.8	13.7	1.7	-2.1	55.4	1	8	3	1	40	1	3	0	30	0	2	2	2	2	1	1	1	1	2	2	2	2	1044	1	1	1
227	5-02-02-E	2005-11-27	10.5	48	1	2	2	2.45	2	1	1	4	4	3	1	5	32.2	145.35	18.1	15.2	18.1	-0.91	56.4	1	10.8	4	1	38	1	1	0	37	0	7	4	5.5	5.5	2	2	2	1	2	2	2	2	1131	1	2	2
263	7-01-08-E	2005-06-24	11	36	1	4	2	3.98	1	1	1	4	4	5	1	6	26	141.55	-0.27	13	0.2	-3.09	50.1	1	7.8	3	1	40	1	1	1	25	0	7	7	7	7	2	1	1	1	2	2	2	2	2152	1	1	2
219	6-02-02-E	2005-09-13	10.75	40	1	2	2	2.4	1	1	1	3	3	3	1	5	44.55	146.25	0.68	20.8	94.8	1.63	76.2	5	20	8	1	36	2	3	0	29	0	7	7	7	7	2	3	5	3	1	1	1	2	#NULL!	1	2	2
216	5-10-05-E	2005-07-15	10.8333	38	1	3	2	3.27	1	1	1	4	4	2	1	6	41.6	148.1	0.89	19	83.4	0.97	66.3	2	17.4	8	1	38	1	3	0	27	0	5	5	5	5	2	2	5	2	1	2	2	2	1419	1	2	2
33	1-07-01-E	2005-01-30	11.5	51	1	3	1	3	1	1	1	2	3	3	1	5	38.1	152.1	0.86	16.5	33.7	-0.42	64.9	2	7.6	3	2	37	1	3	0	40	0	5	5	5	5	2	2	1	2	2	2	2	2	#NULL!	1	2	1
231	6-01-02-E	2005-09-02	10.75	41	1	4	4	3.4	2	1	1	4	4	4	1	6	32.9	149.4	0.88	14.7	9.5	-1.31	57.2	1	10	4	1	38	1	3	0	30	0	7	7	7	7	2	2	2	1	2	2	2	2	1228	1	2	2
176	3-01-11-NE	2005-04-01	11.1667	45	1	2	2	3.93	1	1	1	4	5	3	1	6	25.3	139.8	-0.63	12.9	0.2	-3.16	58.5	1	7.2	3	1	40	1	1	1	34	0	0	7	3.5	3.5	1	1	1	1	2	2	2	2	1992	1	2	2
401	4-10-26-E	2006-01-20	10.5833	50	1	2	2	3.59	2	1	1	7	8	5	1	6	34.2	137.3	-0.82	18.1	68.8	0.49	60.4	1	14.4	5	1	38	1	3	1	39	0	7	7	7	7	2	2	3	1	2	2	2	2	1035	1	1	2
173	3-01-03-E	2005-12-17	10.4167	33	1	3	1	3.33	2	1	1	4	3	4	1	6	41.5	146.8	0.8	19.3	82.9	0.95	71.9	5	16.6	7	1	40	1	1	0	22	0	2	2	2	2	1	2	4	3	1	2	1	2	#NULL!	1	2	1
50	1-04-01-E	2005-09-23	10.5833	52	1	2	2	3.23	1	3	3	1	3	2	1	6	23.15	134.9	-0.89	12.7	0.2	-3.22	52.2	2	4.9	1	1	38	1	3	0	41	0	5	7	6	6	2	1	1	2	2	2	2	2	996	2	2	2
220	5-05-01-E	2005-05-24	11	41	1	2	1	3.7	2	1	1	4	4	4	1	6	31.2	137.6	-1.17	16.5	34.9	-0.39	55.2	1	12	4	1	39	1	3	1	30	0	7	7	7	7	2	2	2	1	2	2	2	2	1218.67	1	2	1
121	4-03-01-E	2005-11-30	10.4167	38	1	2	1	2.5	1	1	1	4	4	4	1	6	23.2	137.85	-0.35	12.2	0.2	-3.7	61.1	1	#NULL!	#NULL!	1	40	1	1	0	27	0	3	3	3	3	1	1	#NULL!	1	#NULL!	2	2	2	#NULL!	1	2	1
218	5-06-01-E	2005-10-05	10.6667	45	1	3	3	2.24	2	1	1	5	5	4	2	0	25.6	130.85	-1.85	15	12.7	-1.14	52	1	8.6	3	2	36	2	3	0	34	1	3	3	3	3	1	2	1	1	2	2	2	2	1306	1	2	2
239	5-01-01-E	2005-08-27	10.75	47	1	4	1	3.05	1	1	1	5	5	4	1	6	25.05	134.5	-1.13	13.8	1.7	-2.13	54.9	1	7.2	3	2	39	1	3	0	36	0	7	7	7	7	2	1	1	1	2	2	2	2	1265	1	2	1
269	8-01-03-E	2005-09-01	10.8333	48	1	4	1	3.8	2	1	1	5	4	3	1	5	40.7	146.2	0.31	19	77.7	0.76	60.4	1	12.2	4	1	39	1	3	1	37	0	0	0	0	0	1	2	2	1	2	2	2	2	1138	1	2	1
137	4-01-01-E	2005-03-27	11.0833	45	1	4	2	3.1	2	1	4	5	4	5	1	4	34.9	147.8	0.29	16	24.9	-0.68	62.2	1	12	4	1	#NULL!	1	1	0	34	0	5	5	5	5	2	2	2	1	2	2	2	2	#NULL!	1	1	2
385	2-01-06-E	2005-02-05	11.5	40	1	2	2	3.8	2	1	1	4	4	4	1	6	35.7	142.75	-0.8	17.5	48.5	-0.04	61.6	1	18.2	7	1	39	1	1	1	29	0	0	0	0	0	1	2	4	1	1	2	2	2	2624	1	2	2
141	4-09-03-E	2005-04-16	11	41	1	4	1	2.9	2	1	1	4	4	2	1	6	25.5	132.7	-1.92	14.5	5.6	-1.59	53.5	1	7	2	1	37	1	3	0	30	0	7	7	7	7	2	2	1	1	2	2	2	2	#NULL!	1	2	1
293	8-03-10-E	2005-09-02	10.8333	41	1	1	3	2.57	2	1	4	4	4	3	1	3	29.2	140	-0.63	14.9	10.8	-1.24	55.6	1	8	3	1	39	1	1	0	30	1	5	4	4.5	4.5	1	2	1	1	2	2	2	2	1218	1	2	2
381	2-05-07-E	2005-12-12	10.5833	47	1	3	1	2	1	1	1	4	5	4	1	1	37.2	138.4	-0.42	19.4	88.4	1.19	64.6	2	12	5	1	35	2	3	0	36	1	4	2	3	3	1	3	3	2	2	1	2	2	1242	1	2	1
367	2-01-01-E	2005-07-16	11	55	1	4	2	3.53	2	1	1	5	5	4	1	4	42.4	147.2	0.29	19.6	81.4	0.89	67.3	2	18.2	7	2	37	1	3	1	44	0	4	2	3	3	1	2	4	2	1	2	2	2	#NULL!	1	2	2
289	8-03-17-E	2005-05-17	11.1667	51	1	4	3	3.5	2	1	1	5	5	4	1	6	35.1	148.7	0.4	15.1	22.8	-0.75	58	1	7.8	2	1	37	1	3	1	40	0	2	2	2	2	1	2	1	1	2	2	2	2	1143	1	2	2
285	8-02-01-E	2005-04-03	11.25	46	1	2	2	3.1	2	1	1	3	5	5	1	6	25.7	135.2	-1.73	14.1	2.4	-1.97	53.7	1	7.8	2	1	39	1	3	0	35	0	1	1	1	1	1	2	1	1	2	2	2	2	1993	1	1	2
49	1-05-01-E	2005-10-31	10.4167	50	1	4	4	2.75	1	1	1	3	3	4	1	4	36.1	144.3	0.61	17.3	63.8	0.35	65.6	3	13.8	6	1	38	1	1	0	39	0	7	7	7	7	2	2	4	2	1	2	2	2	1818	1	2	2
39	1-22-01-E	2005-01-06	11.25	46	1	2	2	3.25	1	3	3	5	4	5	1	6	51.4	161	2.29	19.8	87.2	1.14	79.65	6	14.8	6	1	39	1	3	0	35	0	7	7	7	7	2	3	4	3	1	1	1	2	1905	2	1	2
301	8-06-02-E	2005-12-02	10.5833	34	1	4	1	3.15	2	1	1	4	4	4	1	6	40.5	153	1.59	17.3	55.6	0.14	71.6	3	12.8	5	1	38	1	3	0	23	0	2	2	2	2	1	2	3	2	2	2	2	2	2924	1	2	1
261	7-01-01-E	2005-12-04	10.5833	37	1	4	2	3.42	1	1	1	5	5	7	1	4	49.3	151.55	1.61	21.5	96.8	1.85	76.6	5	22	8	1	37	1	3	0	26	0	7	7	7	7	2	3	5	3	1	1	1	2	1966	1	1	2
405	8-03-98-E	2005-08-05	11.0833	46	1	4	2	4.08	1	1	1	4	4	5	1	6	29.7	141.1	-0.38	14.9	9.3	-1.32	59.2	1	10.4	4	2	37	1	3	1	35	0	3	4	3.5	3.5	1	2	2	1	2	2	2	2	1761	1	1	2
299	8-06-01-E	2005-05-25	11.0833	40	1	2	1	3.36	2	1	1	5	4	3	1	6	31.8	130.4	-2.32	18.4	71.7	0.56	64.2	2	16.8	7	1	38	1	1	0	29	0	4	4	4	4	1	2	4	2	1	2	2	2	1286	1	2	1
292	8-03-11-E	2005-02-12	11.4167	41	1	3	2	3.12	2	1	1	5	5	5	1	6	50.9	148	0.05	23.2	96.3	1.79	75	5	25	9	1	39	1	1	0	30	0	5	3	4	4	1	3	5	3	1	1	1	2	1588	1	1	2
221	5-01-02-E	2005-11-29	10.5	45	1	4	3	2.88	2	1	1	4	4	3	1	6	38.4	147.65	0.86	17.6	61.9	0.3	63.2	1	16.6	7	1	40	1	1	0	34	0	2	0	1	1	1	2	4	1	1	2	2	2	2494	1	2	2
101	4-05-01-E	2005-07-22	10.75	42	1	4	2	3.6	1	1	1	3	4	5	1	6	42.2	142.2	0.02	20.9	94.8	1.62	72.2	4	14.2	6	2	38	1	3	1	31	0	7	7	7	7	2	3	4	2	1	1	2	2	2585	1	1	2
41	1-15-02-E	2005-06-21	10.8333	49	1	4	3	3.72	1	1	1	5	5	4	1	6	30.3	143.5	0.15	14.7	7.9	1.41	56.2	1	9	4	1	40	1	1	1	38	0	0	0	0	0	1	3	2	1	2	1	2	2	#NULL!	1	2	2
59	1-04-04-E	2005-11-10	10.4167	31	1	2	1	3.36	2	1	1	5	5	4	1	6	26	134.6	-1.09	14.4	6.9	-1.48	49.9	1	10.2	4	1	39	1	1	0	20	0	7	7	7	7	2	2	2	1	2	2	2	2	1842.33	1	2	1
243	7-01-07-E	2005-11-29	10.5833	32	1	2	1	2.6	1	1	1	5	4	6	1	5	25.45	134.75	-0.95	14	2.8	-1.92	56.2	1	13.2	5	1	39	1	1	0	21	0	5	5	5	5	2	2	3	1	2	2	2	2	1003	1	1	1
358	2-03-01-E	2005-10-07	10.75	48	1	2	2	2.7	2	1	1	8	8	5	1	6	27.1	133.6	-1.55	15.2	15	-1.04	56	1	13	5	2	37	1	3	0	37	0	7	7	7	7	2	2	3	1	2	2	2	2	2158	1	1	2
300	8-08-01-E	2005-08-03	11.0833	42	1	2	1	3.08	1	1	1	5	5	5	1	6	27.3	134.4	-0.82	14.5	5.1	-1.64	52.9	1	9.4	4	1	38	1	3	0	31	0	5	5	5	5	2	2	2	1	2	2	2	2	1514	1	1	1
51	1-20-04-E	2005-07-31	10.75	34	1	2	1	3.1	1	1	1	5	4	5	1	6	40.3	142.6	0.12	19.8	90.3	1.3	63.8	2	15	7	1	39	1	3	0	23	0	0	0	0	0	1	3	4	2	1	1	2	2	#NULL!	1	1	1
410	8-03-97-E	2005-11-28	10.75	44	1	2	1	2.9	2	1	1	4	4	3	1	6	26.8	132.55	-1.68	15.3	16.3	-0.98	55.2	1	9.6	3	1	40	1	3	0	33	0	3	3	3	3	1	2	1	1	2	2	2	2	2175	1	2	1
296	8-03-06-E	2005-07-15	11	47	1	2	1	2.3	2	1	1	5	4	4	1	6	49	152.1	1.07	21.4	91.8	1.39	69.2	3	19.6	8	1	35	2	1	0	36	0	7	4	5.5	5.5	2	3	5	2	1	1	2	2	1942	1	2	1
45	1-15-03-E	2005-08-30	10.6667	34	1	4	2	2.8	2	1	1	4	5	4	1	6	28.55	138	-0.76	15	13.3	1.16	59.6	1	10.2	4	1	40	1	1	0	23	0	2	2	2	2	1	3	2	1	2	1	2	2	1713	1	2	2
297	8-04-02-E	2005-02-14	11.4167	50	1	2	3	3	1	1	1	3	3	5	1	6	50.5	147.4	0.28	23.2	98.1	2.07	75.5	5	18.8	8	1	40	1	2	0	39	0	3	3	3	3	1	4	5	3	1	1	1	1	1476	1	1	2
175	3-02-01-E	2005-09-27	10.6667	47	1	3	2	4.15	2	1	1	4	4	4	1	6	37.7	136.5	-0.98	20.2	88.5	1.2	70.3	3	15.6	5	1	38	1	3	1	36	0	2	1	1.5	1.5	1	3	3	2	2	1	2	2	1586	1	2	2
290	5-05-03-E	2005-09-21	10.75	43	1	3	3	2.8	2	1	1	5	5	4	1	6	36	143.6	-0.03	17.5	56	0.15	60.6	1	15.6	5	1	39	1	1	0	32	0	2	2	2	2	1	2	3	1	2	2	2	2	1606	1	2	2
377	2-19-02-E	2005-08-10	10.9167	42	1	3	1	3.5	1	1	1	3	3	4	1	6	40.8	137.2	-0.86	21.7	96.5	1.81	69.1	3	18.2	8	1	37	1	3	1	31	0	7	7	7	7	2	3	5	2	1	1	2	2	#NULL!	1	2	1
373	2-21-02-E	2005-07-27	11	49	1	3	2	2.4	2	1	1	4	5	4	1	0	33.6	139.5	-0.84	17.3	50.2	0	68.6	2	14.6	5	1	37	1	3	0	38	1	7	7	7	7	2	2	3	2	2	2	2	2	2387	1	2	2
406	2-09-11-E	2005-11-24	10.75	36	1	4	1	3.8	1	1	1	5	5	3	1	6	27.3	141.15	-0.13	13.7	1.2	-2.26	54.8	1	7.8	3	1	37	1	3	1	25	0	7	7	7	7	2	1	1	1	2	2	2	2	1427	1	2	1
252	7-01-02-E	2005-04-06	11.25	57	1	4	1	2.6	2	1	1	8	5	7	1	6	43.8	147.1	0.06	20.2	85	1.04	66.7	2	19.4	8	1	37	1	3	0	46	0	2	2	2	2	1	3	5	2	1	1	2	2	1528.33	1	1	1
397	8-03-91-E	2005-06-16	11.1667	47	1	4	2	2.45	2	1	1	5	5	4	1	6	36	141.95	-0.64	17.9	58.3	0.21	74	4	13.2	5	1	37	1	3	0	36	0	7	4	5.5	5.5	2	2	3	2	2	2	2	2	2365	1	2	2
160	4-02-02-E	2005-11-26	10.4167	37	1	4	1	2.935	1	1	1	5	3	4	1	6	27	136.4	-0.58	14.5	7.4	-1.45	54	1	#NULL!	#NULL!	2	38	1	3	0	26	0	3	3	3	3	1	2	#NULL!	1	#NULL!	2	2	2	#NULL!	1	2	1
172	3-01-02-E	2005-03-04	11.25	39	1	2	1	3.2	1	1	1	5	5	5	1	6	33.1	151.3	0.99	14.5	4.1	-1.75	55.5	1	6.7	3	1	39	1	3	0	28	0	7	7	7	7	2	2	1	1	2	2	2	2	1560	1	1	1
352	2-12-01-E	2005-10-01	10.8333	40	1	3	2	3.9	2	1	1	4	4	4	1	6	34.1	137.1	-1.03	18.1	66.8	0.43	59.8	1	17.8	7	1	38	1	3	1	29	0	7	7	7	7	2	2	4	1	1	2	2	2	#NULL!	1	2	2
79	1-08-02-E	2005-12-11	10.3333	37	1	4	4	3.05	2	1	1	3	5	3	1	6	49.7	147.5	0.96	22.8	97.5	1.96	60.4	1	14.8	5	1	37	1	3	0	26	0	0	0	0	0	1	3	3	1	2	1	2	2	#NULL!	1	2	2
375	2-02-02-E	2006-01-23	10.5	49	1	2	3	3.9	2	1	1	5	4	4	1	4	49.4	148.7	0.9	22.6	97	1.88	75.5	5	21.8	8	1	39	1	3	1	38	0	7	7	7	7	2	3	5	3	1	1	1	2	#NULL!	1	2	2
193	6-02-01-E	2005-08-03	10.8333	37	1	2	1	3.3	1	1	1	4	4	3	1	6	24.3	135	-1.1	13.3	0.4	-2.65	52.3	1	6.8	3	1	40	1	2	0	26	0	6	6	6	6	2	1	1	1	2	2	2	2	1676	1	2	1
139	4-09-02-E	2005-05-24	10.9167	40	1	2	2	3.08	1	1	4	4	4	4	2	0	34.3	150.5	1.13	15.1	13.1	-1.12	59.4	1	10.8	5	1	40	1	1	0	29	1	2	2	2	2	1	2	3	1	2	2	2	2	1449	1	2	2
105	4-06-01-E	2005-03-17	11.0833	53	1	2	2	3.41	1	1	1	5	4	5	1	4	33.8	149.5	0.81	15.1	11.8	-1.19	61	1	#NULL!	#NULL!	1	39	1	1	0	42	0	5	5	5	5	2	2	#NULL!	1	#NULL!	2	2	2	1392	1	1	2
83	1-08-01-E	2005-01-24	11.4167	43	1	4	2	3.04	2	1	1	5	4	2	1	6	53.2	154.8	0.14	22.5	91.6	1.38	77.4	5	21.6	8	1	39	1	1	0	32	0	2	1	1.5	1.5	1	3	5	3	1	1	1	2	#NULL!	1	2	2
383	2-19-01-E	2005-04-09	11.25	36	1	4	2	3	2	1	1	4	3	4	1	4	35.1	144.8	-0.34	16.7	36.5	-0.35	60.2	1	10	4	1	40	1	1	0	25	0	0	0	0	0	1	2	2	1	2	2	2	2	1664	1	2	2
188	5-03-02-E	2005-05-18	11	40	1	4	2	3.14	1	1	1	5	5	5	1	6	23.95	144.1	-1.39	13.3	0.3	-2.75	50.5	1	9.6	4	1	38	1	3	0	29	0	6	6	6	6	2	1	2	1	2	2	2	2	1417	1	1	2
275	8-03-15-E	2005-10-27	10.6667	47	1	2	3	2.75	2	1	1	4	5	4	1	6	31.8	135.9	-1.11	17.2	53	0.07	62.4	1	16.6	7	1	37	1	3	0	36	0	7	2	4.5	4.5	1	2	4	1	1	2	2	2	722	1	2	2
274	8-03-22-E	2005-03-10	11.3333	45	1	3	2	3.2	2	1	1	9	4	5	1	4	52	152	-0.71	22.5	94.9	1.64	75	5	20	8	1	40	1	3	0	34	0	0	0	0	0	1	3	5	3	1	1	1	2	1808	1	1	2
276	8-03-12-E	2005-09-12	10.8333	44	1	4	3	2.92	1	1	1	5	4	4	1	6	32.9	139.8	-0.37	16.8	49.6	-0.01	63.8	2	9.2	4	1	38	1	3	0	33	0	5	5	5	5	2	2	2	2	2	2	2	2	1950	1	2	2
196	6-03-01-E	2005-04-01	11.1667	45	1	4	2	2.8	1	1	1	5	5	5	1	4	45.6	145.5	0.18	21.5	95.6	1.75	79.4	6	20.2	8	2	38	1	1	0	34	0	2	2	2	2	1	3	5	3	1	1	1	2	1527	1	1	2
302	8-04-01-E	2005-03-07	11.3333	42	1	4	2	2.8	1	1	1	4	5	4	2	0	37.7	141	-0.61	19	79.4	0.82	65.5	2	13.4	5	2	#NULL!	1	3	0	31	1	7	1	4	4	1	2	3	2	2	2	2	2	2006	1	2	2
260	7-01-15-NE	2005-12-20	10.5	34	1	2	1	3.1	1	1	1	5	4	4	1	4	39.6	139.65	-0.16	20.3	93.6	1.52	67.9	2	15.6	7	1	38	1	1	0	23	0	7	5	6	6	2	3	4	2	1	1	2	2	1720	1	2	1
100	4-07-01-E	2005-09-06	10.6667	42	1	2	3	2.855	2	1	1	5	5	4	1	6	38.3	137.8	-0.79	20.2	88.2	1.19	60.5	1	15	5	1	38	1	1	0	31	0	3	2	2.5	2.5	1	3	3	1	2	1	2	2	#NULL!	1	2	2
3	1-11-01-E	2005-03-07	11.0833	41	1	2	1	2.87	1	1	1	3	3	4	1	3	41.8	135.8	-1.16	22.7	97.9	2.03	78.4	5	19.6	8	2	37	1	3	0	30	1	3	5	4	4	1	4	5	3	1	1	1	1	#NULL!	1	2	1
311	8-03-02-E	2005-05-08	11.1667	40	1	3	2	2.97	2	1	1	5	3	3	1	2	31.4	134.6	-1.75	17.3	48.9	-0.03	58.8	1	19.6	8	1	41	1	1	0	29	1	7	2	4.5	4.5	1	2	5	1	1	2	2	2	1398	1	2	2
10	1-13-04-E	2005-09-10	10.5	46	1	4	5	2.5	1	1	1	3	3	4	1	6	24.8	134.5	-0.96	13.7	1.4	-2.19	50.8	1	5.6	2	1	39	1	1	0	35	0	2	2	2	2	1	1	1	1	2	2	2	2	1382.5	1	2	2
81	1-12-03-E	2005-07-02	10.8333	41	1	4	1	2.85	2	3	3	4	5	4	1	6	28	138.9	-0.77	14.5	6.9	-1.49	55.4	1	7.4	2	1	37	1	3	0	30	0	5	5	5	5	2	2	1	1	2	2	2	2	#NULL!	2	2	1
388	1-14-01-E	2005-06-27	10.8333	39	1	4	1	3.25	2	1	1	8	5	5	1	5	39.35	138.2	-0.87	20.6	89.9	1.27	75	5	19	8	1	40	1	3	0	28	0	0	0	0	0	1	3	5	3	1	1	1	2	#NULL!	1	1	1
325	8-05-01-E	2005-02-11	11.4167	46	1	4	2	3.98	2	1	1	5	5	5	1	5	32.8	140	-1.16	16.7	34.9	-0.39	62.7	1	10.6	4	1	37	1	3	1	35	0	5	5	5	5	2	2	2	1	2	2	2	2	1817	1	1	2
393	2-03-21-E	2005-08-18	11	42	1	3	2	3.52	2	1	1	4	4	4	1	6	35.55	147.4	0.33	16.4	33	-0.44	65.2	2	17.2	7	1	37	1	3	1	31	0	7	7	7	7	2	2	4	2	1	2	2	2	1237	1	2	2
288	8-03-03-E	2006-01-12	10.5	50	1	2	2	2.9	2	1	1	5	4	4	1	3	21.6	137.4	-0.68	11.4	0.2	-3.98	48.4	1	6	1	1	39	1	1	0	39	1	7	7	7	7	2	1	1	1	2	2	2	2	1091	1	2	2
224	5-10-01-E	2005-09-06	10.75	47	1	4	2	2.72	2	1	1	5	5	4	1	4	21	126.3	-2.65	13.2	0.6	-2.51	48.7	1	9	3	1	38	1	1	0	36	0	7	2	4.5	4.5	1	1	1	1	2	2	2	2	2218	1	2	2
354	2-04-02-E	2005-12-13	10.5833	40	1	2	3	2.9	2	1	1	4	3	4	1	6	24.7	135.5	-1.09	13.5	1.3	-2.22	51.2	1	10	4	1	38	1	3	0	29	0	7	7	7	7	2	1	2	1	2	2	2	2	1358	1	2	2
398	8-03-90-E	2005-07-23	11.0833	48	1	2	1	2.25	1	1	1	5	5	3	1	6	43.85	138.4	0.02	22.9	99.1	2.36	80	6	18.3	8	1	37	1	3	0	37	0	3	2	2.5	2.5	1	4	5	3	1	1	1	1	1931	1	2	1
402	2-07-11-E	2005-07-07	11.1667	39	1	2	2	2.9	2	1	1	4	5	4	1	6	26.7	134.75	-1.7	14.7	7.1	-1.47	58.2	1	11	4	1	40	1	3	0	28	0	6	6	6	6	2	2	2	1	2	2	2	2	1698	1	2	2
27	1-06-01-E	2005-01-29	11.5	49	1	2	3	3.89	2	1	1	4	5	7	1	6	35.2	139.9	-1.25	18	56	0.15	61.2	1	15.2	5	1	39	1	3	1	38	0	5	3	4	4	1	2	3	1	2	2	2	2	2495	1	1	2
281	8-03-18-E	2005-10-05	10.75	49	1	3	3	3.5	2	1	1	4	5	6	1	6	48.1	145.8	0.34	22.6	96.5	1.84	75	5	24	9	2	38	1	3	1	38	0	2	2	2	2	1	3	5	3	1	1	1	2	1583	1	1	2
42	1-10-01-E	2005-09-21	10.5833	37	1	3	2	3.48	1	1	1	4	5	4	1	6	45.8	150	1.35	20.4	93.5	1.52	66.8	2	12.4	5	1	39	1	1	0	26	0	7	7	7	7	2	3	3	2	2	1	2	2	1133	1	2	2
280	5-05-02-E	2006-01-19	10.4167	37	1	2	2	3.3	1	1	1	5	4	1	1	6	33.2	133.6	-1.03	18.6	82.1	0.92	52.4	2	11	5	1	39	1	1	0	26	0	5	2	3.5	3.5	1	2	3	2	2	2	2	2	2197	1	2	2
40	1-17-01-E	2005-04-09	11.0833	42	1	2	2	3.3	1	1	1	5	5	5	1	6	31.9	145	0.22	15.2	13.1	-1.12	58.8	1	12.8	5	1	38	1	1	0	31	0	7	7	7	7	2	2	3	1	2	2	2	2	#NULL!	1	1	2
277	8-01-01-E	2005-06-10	11.0833	45	1	2	3	2.8	2	1	1	5	5	6	1	6	28.1	139.8	-0.87	14.4	4.7	-1.61	47	1	9.2	3	1	38	1	3	0	34	0	6	0	3	3	1	2	1	1	2	2	2	2	#NULL!	1	1	2
12	1-09-07-E	2005-11-17	10.3333	39	1	3	1	2.71	1	1	1	5	4	2	1	5	25.3	144.6	0.73	12.1	0.2	-3.8	51.2	1	7.3	3	1	37	1	1	0	28	0	6	2	4	4	1	1	1	1	2	2	2	2	#NULL!	1	2	1
382	2-05-06-E	2005-07-28	11	43	1	2	3	3.065	2	1	1	4	4	4	1	5	42.7	148.25	0.47	19.4	80.3	0.85	70.2	3	21.6	8	1	38	1	1	0	32	0	6	3	4.5	4.5	1	2	5	2	1	2	2	2	#NULL!	1	2	2
154	4-12-01-E	2005-02-20	11.1667	36	1	2	2	3.6	1	1	1	4	5	5	1	6	30.8	143	-0.21	15.1	10.5	-1.25	60	1	#NULL!	#NULL!	1	40	1	1	1	25	0	7	7	7	7	2	2	#NULL!	1	#NULL!	2	2	2	#NULL!	1	1	2
295	8-09-01-E	2005-03-02	11.3333	48	1	2	1	3.6	1	1	1	5	4	4	1	6	42.9	141.3	-0.57	21.5	95.1	1.65	67	2	19.4	8	1	38	1	3	1	37	0	7	7	7	7	2	3	5	2	1	1	2	2	1141	1	2	1
163	4-12-02-E	2005-06-07	11	39	1	4	1	2.97	1	1	1	4	4	3	1	6	28.4	139.95	-0.49	14.5	5.2	-1.63	55.2	1	#NULL!	#NULL!	1	38	1	1	0	28	0	5	5	5	5	2	2	#NULL!	1	#NULL!	2	2	2	#NULL!	1	2	1
409	2-10-12-E	2005-11-16	10.8333	43	1	1	1	3.34	2	1	1	3	4	4	1	6	30.2	143.35	-0.07	14.7	8.8	-1.35	62.4	1	13.2	5	2	38	1	1	0	32	0	0	0	0	0	1	2	3	1	2	2	2	2	1291	1	2	1
48	1-12-02-E	2005-03-23	10.6667	36	1	3	1	3.4	1	1	1	5	5	4	1	6	32.5	151.6	1.14	14.1	2.5	-1.97	60.1	1	9.8	4	1	38	1	3	0	25	0	5	5	5	5	2	2	2	1	2	2	2	2	#NULL!	1	2	1
28	1-06-07-E	2005-11-16	10.3333	50	1	1	1	2.76	1	2	4	3	2	3	1	6	49.1	152.9	2	21	96.2	1.78	78.4	6	15.4	7	1	38	1	3	0	39	0	7	6	6.5	6.5	2	3	4	3	1	1	1	2	1600	2	2	1
291	5-05-04-E	2005-03-10	11.3333	47	1	4	3	3.675	1	1	1	5	5	3	1	6	29.9	143.6	-0.22	14.5	4.2	-1.73	56.3	1	8	4	1	37	1	1	1	36	0	6	5	5.5	5.5	2	2	2	1	2	2	2	2	#NULL!	1	2	2
389	1-16-01-E	2005-07-25	10.75	37	1	4	2	3	2	1	1	4	4	4	1	6	29.45	141.1	0.35	14.8	10.3	-1.27	66.8	2	11.6	4	1	40	1	1	0	26	0	0	3	1.5	1.5	1	2	2	2	2	2	2	2	#NULL!	1	2	2
282	8-05-02-E	2005-10-24	10.6667	45	1	1	2	2.45	2	1	1	5	4	4	1	6	30.6	137.45	-0.88	16.2	33.5	-0.43	57.6	1	14.6	5	1	37	1	3	0	34	0	4	4	4	4	1	2	3	1	2	2	2	2	2154	1	2	2
284	8-03-20-E	2006-01-06	10.5	45	1	3	2	3.7	2	1	1	4	4	4	1	6	47.1	152.45	1.61	20.3	89.6	1.26	66.2	2	21.6	8	1	37	1	3	1	34	0	0	0	0	0	1	3	5	2	1	1	2	2	1703	1	2	2
113	4-13-01-E	2005-08-17	10.6667	36	1	3	1	3.85	1	1	1	4	5	3	1	6	37.4	136.1	-0.84	20.2	92.4	1.43	63.9	2	18.2	8	1	37	1	1	1	25	0	7	7	7	7	2	3	5	2	1	1	2	2	#NULL!	1	2	1
86	1-17-02-E	2005-10-04	10.5833	47	1	4	1	3.08	2	1	1	5	5	2	1	6	28.3	136.4	-0.91	15.2	17.2	-0.95	54.1	1	15	5	1	40	1	3	0	36	0	2	2	2	2	1	2	3	1	2	2	2	2	1430	1	2	1
387	1-06-04-E	2005-12-02	10.3333	36	1	3	1	3.85	2	2	2	4	4	4	1	6	38.9	139.8	-0.19	19.8	87.8	1.16	70	4	14.2	5	1	37	1	3	1	25	0	3	4	3.5	3.5	1	3	3	2	2	1	2	2	#NULL!	2	2	1
351	2-17-01-E	2005-05-02	11.1667	44	1	3	2	3.4	2	1	1	4	5	3	1	5	53.6	153.9	1.09	22.6	95.5	1.69	66.9	2	18	7	1	36	2	3	0	33	0	4	4	4	4	1	3	4	2	1	1	2	2	#NULL!	1	2	2
294	8-05-03-E	2005-09-05	10.8333	43	1	4	1	3.9	1	1	1	3	5	4	1	6	29.8	138.1	-0.64	15.6	22.9	-0.74	56.8	1	8.6	4	1	38	1	3	1	32	0	3	4	3.5	3.5	1	2	2	1	2	2	2	2	2537	1	2	1
379	2-09-01-E	2005-03-08	11.3333	42	1	3	3	2.55	1	1	4	4	5	5	1	6	51.7	143.2	-0.33	25.2	99.3	2.47	86.5	6	18.2	8	1	36	2	3	0	31	0	2	2	2	2	1	4	5	3	1	1	1	1	1340	1	1	2
9	1-13-01-E	2005-05-30	10.8333	48	1	4	2	1.74	1	1	1	3	3	4	1	6	33.2	135.5	-1.02	18.1	72.4	0.6	74	5	19.4	8	1	38	1	3	0	37	0	3	3	3	3	1	2	5	3	1	2	1	2	#NULL!	1	2	2
180	3-03-01-E	2005-12-01	10.5	39	1	2	3	3.04	2	1	1	4	5	3	1	4	34.2	143.45	0.25	16.6	44.3	-1.14	65.8	2	13.6	5	1	38	1	1	0	28	0	7	5	6	6	2	2	3	2	2	2	2	2	1043	1	2	2
286	8-03-14-E	2005-10-03	10.75	51	1	4	2	3.25	2	1	1	4	4	3	1	6	44.3	139.2	-0.67	22.9	96.9	1.87	71.2	3	22.2	8	1	37	1	3	0	40	0	7	5	6	6	2	3	5	2	1	1	2	2	1115	1	2	2
16	1-09-01-E	2005-06-01	10.8333	48	1	2	1	3.75	2	1	1	4	5	4	1	6	49.9	148.6	0.69	22.6	96.3	1.79	77.9	5	17.2	7	1	37	1	3	1	37	0	0	3	1.5	1.5	1	3	4	3	1	1	1	2	#NULL!	1	2	1
395	5-11-01-E	2005-09-14	10.9167	51	1	2	1	2.35	2	1	1	3	3	1	1	6	32.1	138.15	-0.98	16.8	42.7	-0.18	60.1	1	14.2	5	2	36	2	1	0	40	0	3	4	3.5	3.5	1	2	3	1	2	2	2	2	2107	1	2	1
21	1-02-01-E	2005-01-03	11.25	43	1	3	2	3	2	1	1	3	3	5	1	6	36.1	147.1	0.06	16.7	36.2	-0.35	61.5	1	16	5	1	37	1	1	0	32	0	6	6	6	6	2	2	3	1	2	2	2	2	#NULL!	1	1	2
279	5-05-05-E	2005-09-27	10.75	48	1	4	3	3.72	2	1	1	5	3	3	1	4	35.3	150.2	0.98	15.6	22.5	-0.75	56.3	1	11.6	4	1	41	1	1	1	37	0	0	0	0	0	1	2	2	1	2	2	2	2	2281	1	2	2
287	8-03-01-E	2005-07-26	10.9167	43	1	4	1	3.1	1	1	1	5	8	6	1	4	27.9	138.5	-0.66	14.5	5.8	-1.57	53.4	1	6.4	3	1	#NULL!	1	3	0	32	0	7	0	3.5	3.5	1	2	1	1	2	2	2	2	1245	1	1	1
283	8-05-04-E	2005-02-15	11.4167	41	1	2	2	3.7	2	1	1	5	5	4	1	6	39.9	146.8	-0.12	18.5	65.5	0.4	71.3	3	25.2	9	1	38	1	3	1	30	0	0	0	0	0	1	2	5	2	1	2	2	2	1221	1	2	2
298	7-01-03-E	2005-08-02	10.9167	36	1	4	2	3.4	2	1	1	5	5	4	1	2	40.7	150.1	0.81	18.1	64.3	0.37	68.2	2	17.2	7	1	36	2	3	0	25	1	5	0	2.5	2.5	1	2	4	2	1	2	2	2	2107	1	2	2
412	1-02-05-NE	2005-12-04	10.3333	54	2	2	2	3.6	2	3	3	2	3	2	1	6	25.05	129.2	-1.83	15	15.6	-1.01	55.4	1	6	1	3	37	1	1	#NULL!	27	#NULL!	#NULL!	#NULL!	#NULL!	#NULL!	#NULL!	2	1	1	2	2	2	2	1432	2	2	2
64	1-08-09-NE	2005-07-09	10.75	32	2	4	1	2.175	2	1	1	3	3	3	1	4	25.7	127	-2.56	15.9	27.4	-0.6	51.8	1	14.2	5	3	40	1	1	0	21	0	7	7	7	7	2	2	3	1	2	2	2	2	1098	1	2	1
209	5-09-04-NE	2005-11-29	10.5	40	2	2	1	3.55	1	1	1	4	3	3	1	3	47.4	142.1	0.23	23.5	99.1	2.36	74.2	5	23.2	8	3	41	1	3	1	29	1	2	1	1.5	1.5	1	4	5	3	1	1	1	1	1201	1	2	1
70	1-12-11-NE	2005-06-14	10.8333	45	2	2	2	3.14	2	1	1	4	4	6	1	5	25.5	132.5	-1.79	14.5	6.7	-1.5	53.5	1	9	3	3	38	1	1	0	34	0	5	4	4.5	4.5	1	2	1	1	2	2	2	2	#NULL!	1	1	2
107	4-05-04-NE	2005-03-02	11.1667	35	2	4	2	3.375	1	1	1	4	5	3	1	6	30	145.9	0.23	14.1	2.1	-2.04	67.6	1	7.8	3	3	40	1	1	0	24	0	5	5	5	5	2	1	1	1	2	2	2	2	1398.67	1	2	2
225	5-07-03-NE	2005-05-17	11	32	2	1	1	3.3	2	1	1	4	4	4	1	6	24.8	150.95	0.82	15.3	14.2	-1.07	55.2	1	11.2	4	3	40	1	1	0	21	0	7	7	7	7	2	2	2	1	2	2	2	2	1963	1	2	1
222	5-09-06-NE	2005-09-26	10.6667	37	2	2	1	3.115	2	1	1	5	5	5	1	6	28.3	140.4	-0.42	14.4	6	-1.5	55.6	1	12.2	4	3	40	1	1	0	26	0	0	0	0	0	1	2	2	1	2	2	2	2	1668	1	1	1
245	7-01-21-NE	2005-10-23	10.6667	43	2	2	2	2.95	2	1	1	5	5	5	1	6	24.6	131	-1.85	14.3	5.9	-1.57	50	1	8.6	3	3	41	1	1	0	32	0	7	2	4.5	4.5	1	2	1	1	2	2	2	2	1165.33	1	1	2
249	7-01-01-NE	2005-03-09	11.3333	44	2	2	2	2.9	1	1	1	4	4	3	1	6	25.8	136.3	-1.28	13.9	1.2	-2.27	52.6	1	7.4	3	3	40	1	1	0	33	0	7	7	7	7	2	1	1	1	2	2	2	2	#NULL!	1	2	2
104	4-01-05-NE	2005-06-26	10.8333	44	2	4	2	3.49	1	1	4	3	4	3	1	4	23.8	133.05	-1.41	13.4	0.5	-2.55	51.4	1	7.6	3	3	#NULL!	1	1	0	33	0	7	7	7	7	2	1	1	1	2	2	2	2	#NULL!	1	2	2
57	1-03-05-NE	2005-09-19	10.5833	39	2	2	2	3.35	1	1	1	4	5	4	1	6	26	134.5	-1	14.4	5.3	-1.61	56.1	1	6	2	3	40	1	3	0	28	0	1	2	1.5	1.5	1	2	1	1	2	2	2	2	1249.67	1	2	2
355	2-02-04-NE	2005-12-27	10.5833	41	2	2	2	3	2	1	1	5	3	3	1	4	19.7	122.2	-3.08	13.2	0.8	-2.43	48.5	1	7.2	2	3	38	1	3	0	30	0	0	0	0	0	1	1	1	1	2	2	2	2	1028	1	2	2
323	8-03-56-NE	2005-04-04	11.25	54	2	4	1	2.6	1	1	1	3	3	3	1	6	25.4	138.4	-0.93	13.3	0.2	-2.88	51.7	1	5.6	2	3	40	1	3	0	43	0	3	3	3	3	1	1	1	1	2	2	2	2	1105	1	2	1
198	5-10-06-NE	2005-06-08	11	36	2	1	1	3.1	1	1	1	5	4	4	1	4	27.2	134.7	-1.26	15	10.8	-1.25	55.4	1	10.8	5	3	40	1	1	0	25	0	7	7	7	7	2	2	3	1	2	2	2	2	1348	1	2	1
82	1-12-06-NE	2005-08-24	10.6667	38	2	3	3	3.45	1	3	3	5	8	6	1	6	30.3	147	0.83	14	2.6	-1.94	57.3	1	9.6	4	3	37	1	3	0	27	0	7	6	6.5	6.5	2	2	2	1	2	2	2	2	#NULL!	2	1	2
327	8-03-58-NE	2005-08-24	10.9167	38	2	3	1	2.9	2	1	1	4	3	5	1	6	45.8	153.4	1.35	19.5	81.5	0.89	63.4	1	13.2	5	3	40	1	1	0	27	0	5	5	5	5	2	2	3	1	2	2	2	2	1211	1	1	1
255	7-01-02-NE	2005-03-30	11.25	38	2	1	2	3.5	1	1	1	5	5	6	1	5	27.7	145	0.04	13.2	0.2	-2.96	51	1	7.6	3	3	39	1	3	1	27	0	3	3	3	3	1	1	1	1	2	2	2	2	1880	1	1	2
189	5-02-04-NE	2005-06-19	10.9167	41	2	2	2	2.05	1	1	1	5	4	4	1	6	26.65	134.6	-1.25	14.7	7.4	-1.4	56.8	1	10.6	5	3	37	1	3	0	30	0	7	3	5	5	2	2	3	1	2	2	2	2	1935	1	2	2
98	4-07-08-NE	2006-01-12	10.3333	39	2	2	2	4.055	2	1	1	4	4	5	1	6	25.7	132.3	-1.3	14.7	11.4	-1.2	51.1	1	9	3	3	38	1	1	1	28	0	1	0	0.5	0.5	1	2	1	1	2	2	2	2	1076	1	1	2
248	7-01-22-NE	2005-08-02	10.9167	51	2	2	1	2.9	1	1	1	3	3	2	1	6	42.7	141.2	-0.24	21.4	96	1.75	78	5	15	7	3	39	1	3	0	40	0	3	3	3	3	1	3	4	3	1	1	1	2	#NULL!	1	2	1
197	5-05-02-NE	2005-07-31	10.9167	43	2	2	1	2.4	1	1	1	5	5	4	1	6	27.1	133.8	-1.34	15.1	13.4	-1.11	54.3	1	10.2	4	3	37	1	1	0	32	0	7	7	7	7	2	2	2	1	2	2	2	2	1552	1	2	1
236	5-10-07-NE	2005-03-23	11.1667	43	2	2	2	2.8	1	1	1	5	5	3	1	6	28.3	139.9	0.66	14.5	4.2	-1.73	63.2	2	9.4	4	3	38	1	3	0	32	0	7	7	7	7	2	2	2	2	2	2	2	2	2801	1	2	2
235	5-10-11-NE	2005-03-23	11.1667	43	2	2	2	2.45	2	1	1	5	5	3	1	6	36	147.4	0.14	16.6	34.5	0.4	64.2	2	14	5	3	38	1	3	0	32	0	7	7	7	7	2	2	3	2	2	2	2	2	2476	1	2	2
267	7-01-06-NE	2005-07-01	11	43	2	3	2	3.7	2	1	1	5	5	5	1	5	47.3	151.7	0.99	20.6	88.6	1.21	65.8	2	13.4	5	3	42	1	3	1	32	0	5	4	4.5	4.5	1	3	3	2	2	1	2	2	1782	1	1	2
103	4-02-04-NE	2005-11-24	10.4167	32	2	2	1	1.68	1	1	1	3	3	4	1	6	25	136.3	-0.6	13.5	0.8	-2.4	56	1	7	3	3	40	1	1	0	21	0	7	7	7	7	2	1	1	1	2	2	2	2	2650	1	2	1
201	5-07-02-NE	2005-07-03	10.9167	43	2	2	1	2.9	2	1	1	3	4	4	1	6	25.6	135.15	-1.43	14	3	-1.88	55.3	1	10.8	4	3	40	1	1	0	32	0	6	6	6	6	2	2	2	1	2	2	2	2	1667	1	2	1
268	7-01-04-NE	2005-11-21	10.5833	43	2	3	2	2.7	1	1	1	5	4	3	1	6	28.8	134.4	-1.02	15.9	31.9	-0.47	56.1	1	10.8	5	3	38	1	1	0	32	0	4	4	4	4	1	2	3	1	2	2	2	2	1438	1	2	2
247	7-01-13-NE	2006-01-08	10.5	30	2	1	1	3.4	2	1	1	4	4	4	1	6	28.2	140.1	-0.26	14.4	7	-1.47	55.7	1	10	4	3	40	1	3	0	19	0	7	4	5.5	5.5	2	2	2	1	2	2	2	2	#NULL!	1	2	1
109	4-06-02-NE	2006-01-13	10.25	33	2	2	2	2.3	2	1	1	4	4	4	1	6	23.4	137.1	-0.56	12.4	0.2	-3.03	47.7	1	#NULL!	#NULL!	3	40	1	3	0	22	0	2	2	2	2	1	1	#NULL!	1	#NULL!	2	2	2	#NULL!	1	2	2
37	1-21-03-NE	2005-09-22	10.5833	38	2	2	2	2.93	2	1	1	4	4	5	1	6	27.25	148.1	0.88	12.4	0.2	-3.13	53.6	1	7.2	2	3	40	1	1	0	27	0	1	1	1	1	1	1	1	1	2	2	2	2	966	1	1	2
339	8-03-50-NE	2005-06-15	11.0833	36	2	1	2	3	2	1	1	3	3	3	1	6	23	136.5	-1.37	12.3	0.2	-3.36	50.8	1	6.4	1	3	40	1	1	0	25	0	6	6	6	6	2	1	1	1	2	2	2	2	1846	1	2	2
333	8-03-32-NE	2005-11-11	10.6667	33	2	2	1	2.935	1	1	1	4	4	4	1	6	20.5	127.7	-2.08	12.6	0.2	-3.39	49.8	1	4.6	1	3	40	1	1	0	22	0	3	5	4	4	1	1	1	1	2	2	2	2	1200	1	2	1
99	4-07-03-NE	2005-08-13	10.75	44	2	2	4	3.09	1	1	1	3	3	2	1	6	35.8	141.5	-0.04	17.9	7.4	0.54	64.2	2	14	6	3	39	1	1	0	33	0	7	7	7	7	2	2	4	2	1	2	2	2	905	1	2	2
258	7-01-23-NE	2005-08-16	10.8333	44	2	2	1	2.9	2	1	1	5	4	5	1	4	31.2	135.1	-1.4	17.1	48.4	-0.04	57.6	1	17.2	7	3	40	1	3	0	33	0	5	5	5	5	2	2	4	1	1	2	2	2	#NULL!	1	1	1
30	1-06-05-NE	2005-04-26	11	32	2	2	1	3.3	1	2	2	3	3	2	1	6	30.55	140.5	-0.39	15.5	18.7	-0.89	66	2	7	3	3	37	1	1	0	21	0	5	5	5	5	2	2	1	2	2	2	2	2	#NULL!	2	2	1
29	1-06-08-NE	2005-11-30	10.3333	41	2	3	3	3.27	2	3	3	3	3	3	1	3	27.9	138.1	-0.43	14.6	10.6	-1.25	54.9	1	10.3	4	3	39	1	1	0	30	1	7	7	7	7	2	2	2	1	2	2	2	2	1565	2	2	2
19	1-09-08-NE	2005-07-16	10.6667	31	2	2	1	2.85	1	3	3	3	3	3	1	6	26.9	140	1	12.2	0.2	-3.75	53.4	1	5.5	2	3	39	1	1	0	20	0	3	3	3	3	1	1	1	1	2	2	2	2	1345	2	2	1
46	1-03-02-NE	2005-04-05	11.0833	35	2	2	2	2.71	2	1	1	3	3	4	1	6	23.7	131.2	-2.15	13.8	1.7	-2.12	50.4	1	7.4	2	3	39	1	1	0	24	0	4	7	5.5	5.5	2	1	1	1	2	2	2	2	#NULL!	1	2	2
411	2-08-11-NE	2005-03-25	11.4167	37	2	1	1	2.7	2	1	1	4	4	4	1	6	37.9	147.15	-0.12	17.5	48.6	-0.03	72.2	3	14	5	3	39	1	1	0	26	0	5	2	3.5	3.5	1	2	3	2	2	2	2	2	1613	1	2	1
317	8-03-35-NE	2005-12-20	10.5833	41	2	2	2	3.645	2	1	1	3	4	3	1	6	21.4	133	-1.43	12.1	0.2	-3.42	47	1	7.2	2	3	40	1	1	1	30	0	7	3	5	5	2	1	1	1	2	2	2	2	1433	1	2	2
391	1-09-03-NE	2005-08-19	10.6667	40	2	3	2	3	2	1	1	4	4	4	1	6	30.75	136.35	-1.01	16.5	40.6	-0.24	61.25	1	7	2	3	40	1	1	0	29	0	7	7	7	7	2	2	1	1	2	2	2	2	1724	1	2	2
118	4-09-06-NE	2005-10-21	10.5	44	2	4	2	3.2	2	1	1	3	4	4	1	6	28.55	137.2	-0.76	15.2	16.8	-0.96	56	1	8.8	3	3	41	1	1	0	33	0	6	6	6	6	2	2	1	1	2	2	2	2	#NULL!	1	2	2
181	3-01-06-NE	2005-10-10	10.5833	44	2	1	4	2.79	2	1	1	3	3	4	1	6	35.2	139.4	0.51	18.1	68.3	0.48	67.2	2	7.2	2	3	40	1	1	0	33	0	7	7	7	7	2	2	1	2	2	2	2	2	1480	1	2	2
178	3-01-08-NE	2005-05-27	11	45	2	1	2	3.84	2	1	1	4	4	2	1	6	27.1	137.6	-1.13	14.3	4.6	-1.69	55.1	1	10	4	3	39	1	3	1	34	0	2	2	2	2	1	2	2	1	2	2	2	2	#NULL!	1	2	2
117	4-09-07-NE	2005-05-12	11	28	2	1	1	2.98	1	1	1	4	4	4	1	6	22.6	127.6	-2.31	13.9	1.5	-2.16	52.2	1	5.6	2	3	40	1	1	0	17	0	7	3	5	5	2	1	1	1	2	2	2	2	1659	1	2	1
171	3-03-05-NE	2005-11-29	10.5	41	2	4	2	2.82	2	1	1	4	4	3	1	6	31	141.3	-0.09	15.5	23.2	-0.73	67.7	2	13.5	5	3	#NULL!	1	1	0	30	0	7	7	7	7	2	2	3	2	2	2	2	2	1735	1	2	2
126	4-14-02-NE	2005-10-11	10.5833	41	2	4	3	3.25	2	1	1	4	4	4	1	6	26.4	139.5	-0.44	13.6	1.7	-2.11	52	1	9.4	3	3	40	1	1	0	30	0	7	7	7	7	2	1	1	1	2	2	2	2	1656	1	2	2
145	4-03-05-NE	2005-07-31	10.75	44	2	4	2	3.055	1	1	1	4	5	2	1	3	21.5	122.7	-2.89	14.3	4.1	-1.74	51.6	1	#NULL!	#NULL!	3	40	1	1	0	33	1	7	7	7	7	2	2	#NULL!	1	#NULL!	2	2	2	868.333	1	2	2
362	1-04-11-NE	2005-03-24	11.0833	41	2	4	1	2.6	2	1	1	4	4	4	1	6	28	136.2	-1.45	15.1	11.9	-1.18	53.4	1	13.2	5	3	40	1	1	0	30	0	5	6	5.5	5.5	2	2	3	1	2	2	2	2	#NULL!	1	2	1
85	1-20-08-NE	2005-05-16	10.9167	37	2	3	3	3.417	2	3	3	3	3	3	1	6	32.4	144.6	-0.04	15.5	18.4	-0.9	57.6	1	9.4	3	3	39	1	1	0	26	0	5	5	5	5	2	2	1	1	2	2	2	2	641	2	2	2
158	4-08-03-NE	2005-07-04	10.8333	31	2	4	1	3	1	2	2	4	3	4	1	5	47.1	150.6	1.24	20.8	94.3	1.58	78.1	5	#NULL!	#NULL!	3	38	1	3	0	20	0	4	2	3	3	1	3	#NULL!	3	#NULL!	1	1	2	1545	2	2	1
338	8-03-47-NE	2005-05-17	11.1667	50	2	4	2	2.6	1	1	1	5	4	3	1	3	22.6	135.1	-1.33	12.4	0.2	-3.72	52	1	5	1	3	40	1	3	0	39	1	3	2	2.5	2.5	1	1	1	1	2	2	2	2	1695	1	2	2
58	1-04-05-NE	2005-10-12	10.5833	34	2	1	1	2.9	2	1	1	4	4	3	1	5	32.7	153.1	1.66	14	3.6	-1.8	55.4	1	10.4	4	3	40	1	1	0	23	0	0	1	0.5	0.5	1	2	2	1	2	2	2	2	2000.33	1	2	1
230	5-03-05-NE	2005-06-10	11	48	2	2	2	2.77	1	1	1	7	8	7	1	4	43.65	146.85	0.55	20.2	91.5	1.4	72.3	4	21.4	8	3	38	1	3	0	37	0	6	6	6	6	2	3	5	2	1	1	2	2	1892	1	1	2
73	1-17-04-NE	2005-09-04	10.6667	34	2	2	1	2.42	2	1	1	4	4	4	1	6	22.2	131.5	-1.73	12.8	0.3	-2.72	49.8	1	8.2	3	3	38	1	3	0	23	0	0	0	0	0	1	1	1	1	2	2	2	2	1837	1	2	1
60	1-04-09-NE	2005-03-16	11.0833	37	2	2	1	3.36	1	1	1	8	7	6	1	6	33.8	136.7	-1.06	18.1	69.8	0.52	58.4	1	15.2	7	3	40	1	3	0	26	0	7	7	7	7	2	2	4	1	1	2	2	2	1657.33	1	1	1
343	2-01-03-NE	2005-04-23	11.25	36	2	2	2	2.6	1	1	1	4	5	5	1	4	30.5	148.1	0.5	13.9	1.3	-2.23	56.8	1	8.2	4	3	37	1	3	0	25	0	2	2	2	2	1	1	2	1	2	2	2	2	1567	1	1	2
356	2-01-05-NE	2005-10-13	10.75	38	2	4	2	2.7	2	1	1	4	4	5	1	6	29.5	135.4	-1.26	16.1	30.6	-0.51	55	1	13.2	5	3	38	1	1	0	27	0	7	7	7	7	2	2	3	1	2	2	2	2	1337	1	1	2
240	5-05-05-NE	2005-07-07	10.5	43	2	2	2	2.4	2	1	1	5	5	4	1	6	22	124	-2.23	14.3	9	-1.34	50.3	1	7.4	2	3	37	1	1	0	32	0	7	7	7	7	2	2	1	1	2	2	2	2	1236.33	1	2	2
234	6-03-06-NE	2005-11-19	10.5	39	2	2	1	3.6	1	1	1	5	5	5	1	6	38.15	142.35	0.24	18.8	83.9	0.99	65.4	2	21.2	8	3	41	1	3	1	28	0	7	4	5.5	5.5	2	2	5	2	1	2	2	2	1429	1	1	1
215	5-10-04-NE	2005-10-06	10.6667	43	2	4	1	2.4	2	1	1	5	8	5	1	6	50.75	146.25	0.5	27	99.6	2.65	73.7	4	21.8	8	3	38	1	3	0	32	0	0	0	0	0	1	4	5	2	1	1	2	1	2110	1	1	1
183	5-10-08-NE	2006-01-17	10.3333	40	2	2	2	3.305	2	1	1	3	4	3	1	3	22.65	133.9	-1.12	12.7	0.2	-2.88	50.2	1	7	2	3	41	1	3	0	29	1	3	3	3	3	1	1	1	1	2	2	2	2	1851	1	2	2
87	1-15-19-NE	2005-05-13	10.9167	34	2	2	1	2.73	1	1	1	4	3	4	1	4	47.1	147.8	0.85	21.3	95.5	1.69	74	4	16.2	7	3	41	1	1	0	23	0	7	7	7	7	2	3	4	2	1	1	2	2	#NULL!	1	2	1
315	8-03-67-NE	2005-06-07	11.0833	42	2	2	3	2.55	1	1	1	2	3	2	1	4	25.7	134.3	-1.41	14.2	3.1	-1.87	54.3	1	5.4	2	3	38	1	1	0	31	0	5	3	4	4	1	2	1	1	2	2	2	2	1246	1	2	2
92	1-20-10-NE	2005-02-03	11.25	44	2	2	2	2.8	1	3	3	4	4	2	1	4	37	144	0.08	17.8	64.6	0.38	63.9	2	9.4	4	3	38	1	3	0	33	0	7	7	7	7	2	2	2	2	2	2	2	2	#NULL!	2	2	2
168	3-03-02-NE	2005-07-19	10.8333	37	2	3	1	3.82	1	1	1	4	4	4	1	6	37.3	142.4	-0.15	18.7	79.8	0.84	67.5	2	16.2	7	3	40	1	3	1	26	0	7	7	7	7	2	2	4	2	1	2	2	2	747	1	2	1
228	5-02-05-NE	2005-08-23	10.75	33	2	4	1	2.5	1	1	1	8	4	5	1	6	43	146.65	0.69	20	91.1	1.35	72.7	4	13.2	5	3	40	1	1	0	22	0	7	4	5.5	5.5	2	3	3	2	2	1	2	2	2096	1	1	1
337	8-03-48-NE	2005-02-26	11.3333	36	2	1	1	3	1	1	1	5	3	4	1	6	27.6	139.7	-0.83	14.1	2	-2.06	52.7	1	5.2	1	3	40	1	1	0	25	0	7	7	7	7	2	1	1	1	2	2	2	2	1209	1	2	1
124	4-02-06-NE	2005-03-12	11.1667	32	2	4	1	3.1	1	1	1	4	4	4	1	6	50.85	155.65	1.71	21	94	1.55	81.5	6	#NULL!	#NULL!	3	#NULL!	1	3	0	21	0	7	7	7	7	2	3	#NULL!	3	#NULL!	1	1	2	1658	1	2	1
1	1-10-08-NE	2005-11-02	10.5	41	2	2	2	3.23	1	1	5	4	4	3	1	6	25.6	143.2	0.42	12.5	0.2	-3.45	49.5	1	5.2	1	3	39	1	1	0	30	0	3	3	3	3	1	1	1	1	2	2	2	2	#NULL!	1	2	2
203	5-02-03-NE	2005-06-14	11	37	2	4	2	3.54	1	1	1	4	3	4	1	6	27.15	140.65	-0.37	13.7	1	-2.31	51.1	1	7	3	3	40	1	1	1	26	0	7	7	7	7	2	1	1	1	2	2	2	2	2006	1	2	2
191	6-01-05-NE	2006-01-30	10.3333	35	2	1	1	3.25	1	1	1	4	4	3	1	6	25.1	126.3	-2.06	15.7	29.8	-0.53	53.2	1	9.2	4	3	40	1	1	0	24	0	7	7	7	7	2	2	2	1	2	2	2	2	1356	1	2	1
13	1-09-05-NE	2005-06-25	10.75	38	2	1	1	2.97	1	1	1	3	3	3	1	6	24.4	136.5	-0.82	13.1	0.2	-2.88	54	1	7.2	3	3	40	1	1	0	27	0	7	7	7	7	2	1	1	1	2	2	2	2	1910	1	2	1
390	1-13-02-NE	2005-07-23	10.75	33	2	2	1	2.75	1	1	1	5	4	4	1	5	37.55	151.5	1.46	16.4	39.9	-0.26	66.5	2	8	4	3	38	1	3	0	22	0	7	7	7	7	2	2	2	2	2	2	2	2	1751	1	2	1
334	8-03-63-NE	2005-10-06	10.75	41	2	2	1	3.515	2	1	1	4	5	7	1	6	30.5	130.9	-1.94	17.8	62	0.31	59	1	13.6	5	3	40	1	1	1	30	0	5	5	5	5	2	2	3	1	2	2	2	2	#NULL!	1	1	1
68	1-15-07-NE	2005-09-01	10.6667	44	2	2	3	2.08	1	1	1	4	4	4	1	6	22.1	132.2	-1.38	12.6	0.2	-3.31	51.5	1	6	2	3	37	1	1	0	33	0	5	5	5	5	2	1	1	1	2	2	2	2	1343.67	1	2	2
326	8-03-52-NE	2005-11-19	10.6667	40	2	2	1	2.7	2	1	1	5	5	4	1	6	32.3	140.9	-0.31	16.3	35.5	-0.37	54.7	1	13.6	5	3	40	1	3	0	29	0	0	0	0	0	1	2	3	1	2	2	2	2	1805	1	2	1
18	1-09-02-NE	2005-06-20	10.75	45	2	2	2	3.47	2	3	3	3	4	3	1	6	32.45	146.5	0.42	15.1	13.9	-1.09	57	1	4.9	1	3	39	1	1	0	34	0	7	2	4.5	4.5	1	2	1	1	2	2	2	2	1475	2	2	2
120	4-09-04-NE	2005-10-20	10.5	29	2	2	1	2.67	1	1	1	4	3	2	1	6	27.05	137.4	-0.51	14.3	5.2	-1.63	56.2	1	8.8	4	3	40	1	1	0	18	0	7	7	7	7	2	2	2	1	2	2	2	2	1537	1	2	1
318	8-03-25-NE	2005-11-24	10.6667	45	2	2	2	2.45	1	1	1	4	2	2	1	6	23.3	130.3	-1.66	13.7	1.4	-2.2	51.7	1	5.2	1	3	38	1	3	0	34	0	5	2	3.5	3.5	1	1	1	1	2	2	2	2	1350	1	2	2
119	4-09-05-NE	2005-04-14	11	38	2	4	1	3	2	1	1	4	4	4	1	6	27.9	149.35	0.57	12.5	0.2	-3.22	51.3	1	8.2	3	3	40	1	1	0	27	0	7	7	7	7	2	1	1	1	2	2	2	2	#NULL!	1	2	1
14	1-09-12-NE	2005-09-29	10.5	39	2	2	1	3.2	1	1	1	3	8	3	1	6	23.8	135.8	-0.73	12.9	0.2	-3.01	53	1	6.4	3	3	40	1	1	0	28	0	7	7	7	7	2	1	1	1	2	2	2	2	#NULL!	1	2	1
112	4-13-02-NE	2005-07-06	10.8333	32	2	2	1	2.58	1	1	1	4	4	4	1	6	26.3	142.4	0.01	13	0.2	-3.04	51.1	1	5	1	3	37	1	3	0	21	0	7	7	7	7	2	1	1	1	2	2	2	2	#NULL!	1	2	1
95	4-14-01-NE	2005-05-25	10.9167	29	2	4	3	2.85	1	1	1	4	5	4	1	4	27.4	141.6	-0.48	13.7	1.5	-2.16	53	1	8.4	4	3	40	1	1	0	18	0	6	7	6.5	6.5	2	1	2	1	2	2	2	2	#NULL!	1	2	2
72	1-20-12-NE	2005-05-05	11	46	2	4	3	2.96	2	3	3	4	4	4	1	6	37.8	140.6	-0.67	19.1	77.3	0.75	66.7	2	14.8	5	3	38	1	3	0	35	0	2	1	1.5	1.5	1	2	3	2	2	2	2	2	#NULL!	2	2	2
106	4-05-03-NE	2005-12-06	10.4167	41	2	1	2	2.48	2	2	2	5	5	4	1	6	25.55	130.1	-1.73	15.1	16.6	-0.97	60	1	7.6	3	3	40	1	1	0	30	0	7	7	7	7	2	2	1	1	2	2	2	2	1463	2	2	2
361	2-08-02-NE	2005-10-04	10.75	40	2	1	1	2.95	2	1	1	8	5	5	1	6	25.1	131.9	-1.81	14.4	6.2	-1.54	54	1	14.2	5	3	40	1	1	0	29	0	3	3	3	3	1	2	3	1	2	2	2	2	1237	1	1	1
331	8-03-51-NE	2005-12-12	10.5833	45	2	2	2	3.2	1	1	1	5	5	7	1	4	21.8	128.4	-1.91	13.2	0.4	-2.69	50.8	1	7.4	3	3	40	1	3	0	34	0	6	6	6	6	2	1	1	1	2	2	2	2	1509	1	1	2
177	3-03-03-NE	2006-01-29	10.3333	37	2	1	1	3.15	2	1	1	5	4	3	1	6	24.4	137.85	-0.46	12.8	6.4	-2.66	64.5	2	9	3	3	40	1	1	0	26	0	1	1	1	1	1	1	1	2	2	2	2	2	1317	1	2	1
74	1-08-03-NE	2005-03-13	11.0833	41	2	2	1	2.975	2	1	1	5	4	3	1	4	42.5	144.3	-0.24	20.4	87	1.12	72	3	15.6	5	3	38	1	1	0	30	0	5	5	5	5	2	3	3	2	2	1	2	2	1081.33	1	2	1
167	3-01-10-NE	2005-07-20	10.8333	32	2	4	1	2.77	2	1	1	5	4	5	1	6	34.5	140.2	-0.6	17.6	56.9	0.18	64.5	2	13.6	5	3	40	1	1	0	21	0	7	7	7	7	2	2	3	2	2	2	2	2	1781.33	1	1	1
133	4-07-06-NE	2005-03-16	11.0833	39	2	4	3	2.55	1	1	1	3	4	3	1	6	31.4	143.7	-0.05	15.2	13	-1.13	56.3	1	6.8	3	3	38	1	1	0	28	0	7	7	7	7	2	2	1	1	2	2	2	2	2220	1	2	2
156	4-08-12-NE	2005-12-15	10.3333	37	2	2	2	2.585	1	1	1	5	4	4	1	6	27.4	137	-0.45	14.6	8.6	-1.36	54.3	1	#NULL!	#NULL!	3	40	1	1	0	26	0	7	7	7	7	2	2	#NULL!	1	#NULL!	2	2	2	#NULL!	1	2	2
204	5-01-04-NE	2006-01-08	10.4167	38	2	2	1	2.7	1	1	1	4	4	3	1	6	25.2	133.05	-1.07	14.2	4.8	-1.67	55.1	1	7.8	4	3	38	1	1	0	27	0	7	7	7	7	2	2	2	1	2	2	2	2	1368	1	2	1
89	1-12-04-NE	2005-01-15	11.25	35	2	2	1	3.08	1	1	1	8	7	2	1	6	27.6	142.5	-0.35	13.6	0.5	-2.54	52.1	1	10.8	5	3	39	1	3	0	24	0	2	4	3	3	1	1	3	1	2	2	2	2	#NULL!	1	2	1
157	4-08-09-NE	2005-11-25	10.4167	39	2	4	2	3.3	1	3	3	4	3	3	1	5	31.15	141.1	0.13	15.6	26.9	-0.62	63	2	#NULL!	#NULL!	3	40	1	3	0	28	0	7	7	7	7	2	2	#NULL!	2	#NULL!	2	2	2	#NULL!	2	2	2
226	5-03-04-NE	2005-08-01	10.8333	31	2	2	1	3.1	1	1	1	4	4	3	1	6	42.6	141.35	0.16	21.3	95.9	1.74	69.9	3	17	7	3	35	2	1	0	20	0	7	7	7	7	2	3	4	2	1	1	2	2	1500	1	2	1
210	6-03-05-NE	2005-06-25	10.9167	36	2	1	1	3.4	1	1	1	5	5	5	1	6	26.4	133.5	0.08	12.8	0.2	-3.22	51	1	5.2	1	3	40	1	1	0	25	0	6	6	6	6	2	1	1	1	2	2	2	2	1854	1	1	1
365	2-02-05-NE	2005-05-20	11.1667	37	2	2	1	3	2	1	1	4	4	4	1	5	48.3	154	1.18	20.4	86.6	1.11	69	2	21	8	3	37	1	3	0	26	0	2	2	2	2	1	3	5	2	1	1	2	2	1262	1	2	1
380	2-02-06-NE	2005-11-12	10.6667	40	2	2	2	3.365	2	1	1	5	4	5	1	6	36.4	144.65	0.21	17.4	56	0.15	62.2	1	13	5	3	39	1	1	0	29	0	1	1	1	1	1	2	3	1	2	2	2	2	1310	1	1	2
368	2-03-03-NE	2005-03-14	11.3333	39	2	1	3	2.8	1	1	1	4	4	3	1	5	26.9	147.7	0.35	12.3	0.2	-3.82	51.1	1	8.2	4	3	40	1	1	0	28	0	7	3	5	5	2	1	2	1	2	2	2	2	#NULL!	1	2	2
313	8-03-39-NE	2005-07-13	11	39	2	2	1	2.5	2	1	1	10	5	5	1	6	39.1	145.9	0.11	18.7	72.8	0.61	58.8	1	15.4	5	3	40	1	1	0	28	0	6	5	5.5	5.5	2	2	3	1	2	2	2	2	2019	1	1	1
232	5-04-03-NE	2005-03-12	11.25	47	2	2	3	3.53	1	1	1	4	5	3	1	4	37.1	141.5	-0.45	18.5	75	0.68	62.9	2	15	7	3	40	1	1	1	36	0	2	3	2.5	2.5	1	2	4	2	1	2	2	2	1521	1	2	2
214	5-10-10-NE	2005-02-24	11.25	39	2	2	1	2.9	2	1	1	5	5	4	1	4	25.75	140.8	-0.91	13	0.2	-2.87	50.7	1	6	1	3	41	1	1	0	28	0	2	1	1.5	1.5	1	1	1	1	2	2	2	2	1094	1	2	1
96	4-11-02-NE	2005-04-04	11.0833	38	2	1	1	3.3	1	1	1	5	4	2	1	6	40.2	144	0.04	19.4	85.4	1.05	66.6	2	13.2	5	3	40	1	3	0	27	0	0	0	0	0	1	3	3	2	2	1	2	2	1288	1	2	1
195	5-01-05-NE	2005-04-23	10.9167	35	2	2	1	3.22	2	1	1	5	5	7	1	6	58	156.6	1.6	23.7	97.4	1.95	67.3	2	21.2	8	3	38	1	1	0	24	0	5	6	5.5	5.5	2	3	5	2	1	1	2	2	1408	1	1	1
353	2-04-05-NE	2005-06-08	11.0833	49	2	2	2	2.84	2	1	1	4	4	4	1	4	23.2	135.7	-1.53	12.6	0.2	-3.16	49.8	1	9.2	3	3	40	1	1	0	38	0	7	4	5.5	5.5	2	1	1	1	2	2	2	2	764	1	2	2
233	5-09-05-NE	2005-09-05	10.75	39	2	4	2	3.2	2	1	1	4	4	4	1	6	34.45	143.35	-0.02	16.8	44	-0.15	63.5	1	14.2	5	3	#NULL!	1	3	0	28	0	7	7	7	7	2	2	3	1	2	2	2	2	945	1	2	2
262	7-01-08-NE	2005-02-22	11.3333	39	2	4	2	3.25	2	1	1	5	9	7	1	6	46.65	151.45	0.6	20.3	85.1	1.04	70.6	3	18.6	7	3	41	1	2	0	28	0	3	2	2.5	2.5	1	3	4	2	1	1	2	2	1867	1	1	2
347	2-12-02-NE	2005-03-31	11.3333	39	2	1	3	2.7	2	1	1	4	4	5	1	6	29.8	133.8	-1.99	16.6	34.6	-0.4	57.6	1	10.4	4	3	39	1	1	0	28	0	5	5	5	5	2	2	2	1	2	2	2	2	1993	1	1	2
308	8-03-60-NE	2005-02-17	11.4167	38	2	2	1	3.1	1	1	1	5	5	4	1	4	43	145.4	-0.02	20.3	90.2	1.29	66.6	2	18.4	8	3	38	1	3	0	27	0	0	0	0	0	1	3	5	2	1	1	2	2	489	1	2	1
321	8-03-29-NE	2005-06-24	11.0833	49	2	4	1	2.9	2	1	1	4	5	3	1	6	38.7	145.1	-0.06	18.4	67.5	0.45	68.5	2	16.6	6	3	38	1	3	0	38	0	7	7	7	7	2	2	4	2	1	2	2	2	1032	1	2	1
213	6-02-10-NE	2005-02-06	11.3333	43	2	2	1	3.17	2	1	1	4	5	3	1	4	46.25	144.3	-0.44	22.2	94.1	1.57	77.4	5	24.2	8	3	40	1	1	0	32	0	0	0	0	0	1	3	5	3	1	1	1	2	1689	1	2	1
63	1-15-08-NE	2005-09-15	10.5833	37	2	2	1	2.7	1	1	1	4	4	3	1	6	24.7	133.7	-1.03	13.8	1.9	-2.08	52.9	1	5.6	2	3	40	1	1	0	26	0	7	7	7	7	2	1	1	1	2	2	2	2	#NULL!	1	2	1
76	1-08-06-NE	2005-08-29	10.6667	41	2	2	2	3	2	1	1	8	7	5	1	4	37.4	144.8	0.27	17.8	63.8	0.35	63.9	2	16.4	7	3	41	1	1	0	30	0	2	0	1	1	1	2	4	2	1	2	2	2	#NULL!	1	1	2
371	2-05-03-NE	2005-03-03	11.3333	42	2	2	2	3.3	2	1	1	5	4	4	1	6	35.3	146.2	-0.21	16.5	31.2	-0.49	58.4	1	12.4	4	3	40	1	1	0	31	0	5	5	5	5	2	2	2	1	2	2	2	2	1390	1	2	2
38	1-16-03-NE	2005-08-31	10.5833	40	2	4	2	2.9	1	1	1	3	3	4	1	6	36.4	134.5	-1.09	14.6	8.9	-1.35	60.45	1	10.8	5	3	38	1	3	0	29	0	5	3	4	4	1	2	3	1	2	2	2	2	982	1	2	2
115	4-01-09-NE	2005-05-08	11	43	2	2	3	2.12	2	1	1	4	5	4	1	6	24.6	134.15	-1.65	13.7	1.5	-2.18	50.4	1	6.6	1	3	38	1	3	0	32	0	6	7	6.5	6.5	2	1	1	1	2	2	2	2	1443	1	2	2
71	1-20-13-NE	2005-07-29	10.5833	33	2	2	1	2.65	1	1	1	5	4	4	1	4	24.9	135.9	-0.77	13.5	0.8	-2.42	55.4	1	4.8	1	3	37	1	1	0	22	0	7	7	7	7	2	1	1	1	2	2	2	2	1255	1	2	1
77	1-10-04-NE	2005-07-30	10.75	31	2	2	1	2.89	2	1	1	4	4	4	1	6	22.4	133.3	-1.55	12.6	0.2	-3.03	48.3	1	7.4	2	3	40	1	1	0	20	0	5	5	5	5	2	1	1	1	2	2	2	2	#NULL!	1	2	1
91	1-04-08-NE	2005-01-01	11.3333	51	2	2	3	2.5	2	1	1	3	3	4	1	6	28.1	130.2	-2.95	16.6	27.1	-0.61	56.4	1	10.8	4	3	39	1	1	0	40	0	7	7	7	7	2	2	2	1	2	2	2	2	871	1	2	2
67	1-15-14-NE	2005-09-22	10.5833	41	2	2	2	3.8	1	1	1	5	5	6	1	3	28.8	141.5	0.07	14.4	5.5	-1.6	54.8	1	8.2	4	3	40	1	3	1	30	1	4	3	3.5	3.5	1	2	2	1	2	2	2	2	#NULL!	1	1	2
111	4-04-02-NE	2005-07-05	10.8333	38	2	2	2	2.5	1	1	1	4	4	5	1	6	39.05	146.2	0.58	14.1	2.5	-1.95	58	1	6.6	3	3	40	1	1	0	27	0	7	7	7	7	2	2	1	1	2	2	2	2	1438.33	1	1	2
151	4-10-08-NE	2005-06-10	10.9167	32	2	4	1	2.88	1	1	1	4	4	5	1	6	32.5	145.6	0.43	15.3	16.3	-0.98	63.6	2	12.8	5	3	38	1	3	0	21	0	4	3	3.5	3.5	1	2	3	2	2	2	2	2	2386	1	1	1
348	2-01-04-NE	2005-05-05	11.1667	36	2	2	1	2.8	2	1	1	7	5	5	1	6	48.1	153	0.96	20.5	87.4	1.14	70.7	3	16.4	6	3	40	1	1	0	25	0	2	2	2	2	1	3	4	2	1	1	2	2	1525	1	1	1
135	4-04-04-NE	2005-04-05	11.0833	51	2	1	4	3.05	1	1	1	4	4	3	1	6	30.01	148.65	0.73	13.6	0.7	-2.44	60.7	1	10	4	3	38	1	1	0	40	0	2	2	2	2	1	1	2	1	2	2	2	2	1835	1	2	2
56	1-12-07-NE	2005-11-08	10.5	40	2	2	2	2.4	1	1	1	5	4	2	1	6	27.1	132.9	-1.15	15.3	20.3	-0.83	67.3	1	8.2	4	3	39	1	1	0	29	0	7	7	7	7	2	2	2	1	2	2	2	2	1705	1	2	2
256	7-01-26-NE	2005-11-04	10.6667	48	2	2	3	3.3	2	1	1	4	3	4	1	6	20.1	130.8	-1.85	11.7	0.2	-3.76	52.7	1	6.6	1	3	39	1	1	0	37	0	5	5	5	5	2	1	1	1	2	2	2	2	1632	1	2	2
349	2-04-04-NE	2005-11-13	10.6667	36	2	2	2	3.11	2	1	1	5	5	4	1	6	59.1	154.8	1.77	24.7	98.8	2.25	74.1	4	24.6	9	3	38	1	1	0	25	0	7	7	7	7	2	4	5	2	1	1	2	1	1885	1	2	2
345	2-03-02-NE	2005-09-06	10.8333	34	2	2	1	2.275	1	1	1	5	4	4	1	6	34.5	133.6	-1.62	19.3	80.3	0.85	66	2	11.6	5	3	39	1	1	0	23	0	7	7	7	7	2	2	3	2	2	2	2	2	2032	1	2	1
359	2-09-04-NE	2005-07-11	11	34	2	2	1	2.8	1	1	1	4	4	3	1	6	27.1	149.5	0.9	12.1	0.2	-3.94	52.4	1	6.2	3	3	39	1	1	0	23	0	2	2	2	2	1	1	1	1	2	2	2	2	1302	1	2	1
136	4-04-03-NE	2006-01-04	10.3333	42	2	4	2	3.15	2	1	1	5	4	4	1	6	57.6	140.9	0	29	99.9	3	88.8	6	25.8	9	3	40	1	3	0	31	0	0	0	0	0	1	4	5	3	1	1	1	1	#NULL!	1	2	2
6	1-14-03-NE	2005-08-30	10.5833	32	2	1	2	2.7	1	3	3	3	4	5	1	2	26.3	145.5	0.69	12.4	0.2	-3.52	51.3	1	8	4	3	40	1	1	0	21	1	2	2	2	2	1	1	2	1	2	2	2	2	#NULL!	2	1	2
314	8-03-42-NE	2005-10-31	10.6667	32	2	1	1	2.53	2	1	1	4	4	3	1	6	47.3	144.8	0.24	22.6	96.5	1.8	75.1	5	16.6	7	3	38	1	1	0	21	0	0	2	1	1	1	3	4	3	1	1	1	2	1604	1	2	1
212	5-01-06-NE	2005-11-24	10.5	24	2	2	1	2.52	1	1	1	3	3	3	1	6	21.2	132.35	-1.27	12.1	0.2	-3.83	48.9	1	5	1	3	37	1	1	0	13	0	7	7	7	7	2	1	1	1	2	2	2	2	1428	1	2	1
187	6-02-09-NE	2005-12-03	10.5	33	2	3	1	2.8	1	1	1	4	4	4	1	6	25.35	133.3	-1.33	14.3	6	-1.55	53	1	7.8	3	3	40	1	1	0	22	0	0	1	0.5	0.5	1	2	1	1	2	2	2	2	1238	1	2	1
307	8-03-26-NE	2005-09-16	10.8333	36	2	3	1	3.08	1	1	1	5	5	4	1	6	32	143.9	0.24	15.5	19.6	-0.86	57.2	1	15.2	7	3	39	1	3	0	25	0	5	4	4.5	4.5	1	2	4	1	1	2	2	2	2295	1	2	1
153	4-11-03-NE	2005-11-21	10.4167	31	2	4	2	3.4	2	1	1	3	4	3	1	4	36.7	140	-0.25	18.7	77.6	0.76	61.6	2	15.6	5	3	#NULL!	1	1	0	20	0	0	0	0	0	1	2	3	2	2	2	2	2	#NULL!	1	2	2
259	7-01-18-NE	2005-12-19	10.5	28	2	4	1	2.85	2	1	1	3	3	3	1	6	25.85	130.2	-1.83	15.2	18.1	-0.91	53	1	8.8	3	3	#NULL!	1	1	0	17	0	5	5	5	5	2	2	1	1	2	2	2	2	1815	1	2	1
319	8-03-65-NE	2005-12-14	10.5833	46	2	4	4	2.4	2	1	1	5	4	5	1	3	32.8	140.3	-0.33	16.7	43.9	-0.15	61.2	1	18	7	3	38	1	3	0	35	1	7	7	7	7	2	2	4	1	1	2	2	2	1881	1	1	2
55	1-08-07-NE	2005-11-26	10.3333	35	2	4	1	2.855	2	1	1	3	3	3	1	6	22.8	129.1	-0.98	13.7	4.7	-1.67	51.6	1	11.6	4	3	38	1	3	0	24	0	4	4	4	4	1	2	2	1	2	2	2	2	#NULL!	1	2	1
132	4-07-07-NE	2005-11-04	10.5	39	2	4	2	2.9	2	1	1	4	3	5	1	6	43.5	156.6	2.24	18.5	74.3	0.65	67.9	2	15.8	6	3	40	1	1	0	28	0	4	4	4	4	1	2	4	2	1	2	2	2	#NULL!	1	1	2
253	7-01-19-NE	2005-11-03	10.6667	38	2	2	5	3.3	2	1	1	4	5	4	1	6	27.5	135.7	-1.11	14.9	12.5	-1.15	51.3	1	9.4	3	3	38	1	3	0	27	0	7	7	7	7	2	2	1	1	2	2	2	2	1779	1	2	2
127	4-01-02-NE	2005-06-15	10.8333	36	2	1	3	2.5	1	1	1	4	3	2	1	6	26.7	136.4	-0.93	14.4	4.3	-1.72	53.7	1	4.8	1	3	41	1	1	0	25	0	4	4	4	4	1	2	1	1	2	2	2	2	2058	1	2	2
186	6-02-06-NE	2005-04-13	11.1667	37	2	1	1	2.75	2	1	1	5	3	4	1	6	25.6	142.3	-0.75	12.7	0.2	-3.09	52.4	1	6.2	1	3	38	1	1	0	26	0	0	0	0	0	1	1	1	1	2	2	2	2	1607	1	2	1
344	2-01-02-NE	2005-04-23	11.25	36	2	2	2	2	2	1	1	4	5	4	1	4	27.1	137	-1.45	14.4	4.6	-1.69	54.9	1	10.2	4	3	37	1	3	0	25	0	0	0	0	0	1	2	2	1	2	2	2	2	#NULL!	1	2	2
182	3-03-04-NE	2005-09-28	10.6667	49	2	3	3	3.2	1	1	1	5	3	4	1	6	30.6	145	0.55	14.6	7	-1.48	56.4	1	10.2	4	3	39	1	3	0	38	0	7	7	7	7	2	2	2	1	2	2	2	2	1520	1	2	2
110	4-06-03-NE	2005-10-18	10.5	41	2	4	1	2.84	2	1	1	5	4	4	1	6	21.4	139.5	-0.41	11	0.2	-4.4	58.8	1	9.8	4	3	40	1	3	0	30	0	5	5	5	5	2	1	2	1	2	2	2	2	1779	1	2	1
184	6-03-04-NE	2005-03-14	11.25	41	2	4	1	2.3	1	1	1	5	5	4	1	5	40.4	152.6	1.18	17.3	55.5	0.14	67.5	2	17.2	7	3	36	2	1	0	30	0	5	2	3.5	3.5	1	2	4	2	1	2	2	2	1757	1	2	1
200	6-02-07-NE	2005-08-15	10.75	44	2	2	3	2.615	2	1	1	5	8	5	1	3	37.9	146.15	0.35	17.7	60.7	0.27	60.7	1	15.2	5	3	39	1	1	0	33	1	6	6	6	6	2	2	3	1	2	2	2	2	1859	1	1	2
4	1-21-02-NE	2005-10-04	10.5	35	2	1	1	2.606	1	1	1	4	4	2	1	3	26.05	137.55	0.47	13.8	1.7	-2.13	54.25	1	6.8	3	3	41	1	1	0	24	1	3	2	2.5	2.5	1	1	1	1	2	2	2	2	1428	1	2	1
170	3-01-05-NE	2005-11-26	10.5	39	2	4	2	2.8	1	1	1	5	4	4	1	4	40.8	141.45	-0.07	20.4	90.3	1.3	69.6	3	10.2	4	3	40	1	3	0	28	0	7	7	7	7	2	3	2	2	2	1	2	2	#NULL!	1	2	2
62	1-20-07-NE	2005-07-21	10.75	37	2	1	2	2.8	2	1	1	4	4	4	1	6	24.9	138.4	-0.81	13	0.4	-2.67	53	1	6.4	1	3	40	1	1	0	26	0	3	2	2.5	2.5	1	1	1	1	2	2	2	2	#NULL!	1	2	2
179	3-01-07-NE	2005-04-22	11.0833	43	2	2	1	3.26	1	1	1	5	4	5	1	6	33.8	144.85	0.16	16.1	30.5	-0.51	65	2	9	4	3	40	1	1	0	32	0	3	3	3	3	1	2	2	2	2	2	2	2	1493	1	1	1
94	1-23-02-NE	2005-10-10	10.5	35	2	1	1	3.075	1	1	1	4	5	5	1	5	34.2	142	0.18	17	55.2	0.13	59.4	1	14	6	3	37	1	1	0	24	0	6	7	6.5	6.5	2	2	4	1	1	2	2	2	784.333	1	1	1
169	3-01-09-NE	2005-11-02	10.5833	43	2	1	2	3.7	1	1	1	5	5	4	1	6	24.8	132.95	-1.2	14	2.9	-1.89	55.5	1	7	3	3	40	1	1	1	32	0	7	7	7	7	2	2	1	1	2	2	2	2	2928.33	1	2	2
370	2-04-06-NE	2005-11-06	10.6667	42	2	2	1	2.9	2	1	1	5	4	4	1	4	23.2	133.9	-1.43	12.9	0.3	-2.7	46.1	1	8.2	3	3	39	1	1	0	31	0	4	3	3.5	3.5	1	1	1	1	2	2	2	2	1059	1	2	1
336	8-03-30-NE	2005-05-08	11.1667	33	2	2	2	2.245	2	1	1	3	3	3	1	6	29.6	149.5	0.47	13.2	0.5	-2.61	50.7	1	8.6	3	3	40	1	1	0	22	0	0	0	0	0	1	1	1	1	2	2	2	2	1166	1	2	2
309	8-03-64-NE	2005-09-26	10.75	47	2	2	1	3.42	2	1	1	5	4	4	1	1	53.2	147.9	0.61	24.3	98.5	2.16	83.6	6	28.2	9	3	41	1	3	0	36	1	4	3	3.5	3.5	1	4	5	3	1	1	1	1	1508	1	2	1
250	7-01-17-NE	2005-03-15	11.25	38	2	2	1	4.25	2	1	1	4	4	3	1	6	47.2	155.45	1.25	19.5	78.7	0.8	69.6	3	14.6	5	3	39	1	3	1	27	0	4	0	2	2	1	2	3	2	2	2	2	2	#NULL!	1	2	1
161	4-03-11-NE	2005-08-05	10.8333	34	2	4	2	2.1	2	1	1	4	4	4	1	6	26.25	144	-0.01	12.7	0.2	-3.01	51	1	#NULL!	#NULL!	3	38	1	1	0	23	0	1	1	1	1	1	1	#NULL!	1	#NULL!	2	2	2	#NULL!	1	2	2
190	5-09-03-NE	2005-11-14	10.5	33	2	1	1	2.7	1	1	1	4	4	4	1	6	40.1	136.85	-0.6	21.4	96.7	1.84	68.9	3	17.2	7	3	#NULL!	1	1	0	22	0	3	3	3	3	1	3	4	2	1	1	2	2	981	1	2	1
22	1-02-03-NE	2005-11-07	10.4167	33	2	2	1	2.8	2	1	1	5	4	4	1	6	30	145	0.57	14.3	6.4	-1.52	53.9	1	9.8	4	3	37	1	3	0	22	0	4	4	4	4	1	2	2	1	2	2	2	2	#NULL!	1	2	1
43	1-12-09-NE	2005-10-12	10.5	38	2	2	1	2.65	1	1	1	4	4	3	1	6	29.6	134.5	-0.96	16.4	42	-0.2	56.8	1	9.2	4	3	37	1	1	0	27	0	7	6	6.5	6.5	2	2	2	1	2	2	2	2	1477.33	1	2	1
312	8-03-44-NE	2005-03-12	11.3333	44	2	4	2	2.4	1	1	1	5	5	6	1	4	34.1	146.5	0.19	15.9	23.4	0.73	57.6	1	10.2	4	3	#NULL!	1	3	0	33	0	0	3	1.5	1.5	1	2	2	1	2	2	2	2	1343.67	1	1	2
131	4-07-09-NE	2005-08-10	10.75	36	2	4	1	2.4	1	1	1	4	4	4	1	6	28.7	140.6	-0.18	14.5	6.3	-1.53	54.9	1	7	3	3	37	1	3	0	25	0	2	2	2	2	1	2	1	1	2	2	2	2	2141	1	2	1
143	4-03-07-NE	2005-12-20	10.3333	33	2	1	1	3.32	1	1	1	5	4	4	1	6	53.1	150.6	1.65	23.4	99.1	2.38	82.6	6	#NULL!	#NULL!	3	38	1	2	0	22	0	7	7	7	7	2	4	#NULL!	3	#NULL!	1	1	1	1125	1	2	1
211	5-01-03-NE	2005-04-17	11.1667	33	2	1	1	2.8	1	1	1	5	4	4	1	4	27.95	131.3	-1.8	16.2	32.2	-0.46	57.2	1	13	5	3	35	2	1	0	22	0	2	2	2	2	1	2	3	1	2	2	2	2	1620	1	2	1
328	8-03-36-NE	2005-11-22	10.6667	33	2	2	1	3.25	2	1	1	8	8	6	1	6	45.6	144.3	0.22	21.9	95.3	1.67	68.6	2	20	8	3	40	1	1	0	22	0	2	2	2	2	1	3	5	2	1	1	2	2	1786	1	1	1
305	8-03-66-NE	2005-10-18	10.75	41	2	2	3	3.175	2	1	1	3	3	4	1	6	23.8	135	-1.28	13.1	0.5	-2.6	49.2	1	8.2	3	3	40	1	1	0	30	0	2	2	2	2	1	1	1	1	2	2	2	2	1380	1	2	2
265	7-01-11-NE	2005-09-04	10.8333	39	2	2	1	4.05	1	1	1	5	4	4	1	6	43.95	144.7	0.36	21	95.1	1.65	69.2	3	22	8	3	40	1	3	1	28	0	3	3	3	3	1	3	5	2	1	1	2	2	1879	1	2	1
155	4-12-03-NE	2005-02-11	11.25	37	2	2	2	2.64	1	1	1	5	5	6	1	6	32.15	137	-1.11	17.1	55	0.03	61	1	14.6	6	3	39	1	1	0	26	0	7	7	7	7	2	2	4	1	1	2	2	2	2009	1	1	2
114	4-01-10-NE	2005-07-24	10.75	42	2	4	1	3.2	1	1	1	5	5	4	1	6	29.7	146.4	0.65	13.9	1.7	-2.1	57.2	1	8.2	4	3	#NULL!	1	1	0	31	0	0	4	2	2	1	1	2	1	2	2	2	2	#NULL!	1	2	1
142	4-03-04-NE	2005-07-13	10.8333	38	2	4	1	2.6	2	1	1	4	4	3	1	5	26.1	134	-1.5	14.5	7.1	-1.47	56.4	1	8	3	3	#NULL!	1	1	0	27	0	7	7	7	7	2	2	1	1	2	2	2	2	1658	1	2	1
254	7-01-16-NE	2005-03-18	11.25	36	2	4	2	3.2	2	1	1	5	4	5	1	6	34.9	149.95	0.44	15.5	15.8	-1	60.1	1	15	5	3	40	1	3	0	25	0	5	5	5	5	2	2	3	1	2	2	2	2	2045	1	1	2
125	4-13-03-NE	2005-06-01	10.9167	41	2	1	2	2.105	2	1	1	5	4	4	1	4	25.55	134.5	-1.53	14.1	3.6	-1.8	50.2	1	7.2	2	3	36	2	1	0	30	0	3	3	3	3	1	2	1	1	2	2	2	2	1225	1	2	2
306	8-03-68-NE	2006-01-15	10.5	40	2	2	1	3.23	1	1	1	4	4	3	1	6	22.8	145.3	0.73	20.3	93.6	1.52	69.5	3	13.4	5	3	40	1	3	0	29	0	7	7	7	7	2	3	3	2	2	1	2	2	1047	1	2	1
149	4-10-05-NE	2005-09-11	10.6667	50	2	2	2	2.91	1	1	1	5	4	4	1	4	41.8	139.95	-0.21	21.3	96.4	1.8	76.1	5	19.8	8	3	40	1	3	0	39	0	4	4	4	4	1	3	5	3	1	1	1	2	1345	1	2	2
75	1-08-05-NE	2005-06-13	10.8333	47	2	2	2	3.2	2	1	1	4	4	4	1	6	28.2	134	-1.56	15.7	22.6	-0.75	55.8	1	8	3	3	37	1	1	0	36	0	7	7	7	7	2	2	1	1	2	2	2	2	#NULL!	1	2	2
15	1-09-11-NE	2005-06-05	10.8333	29	2	2	1	1.85	2	1	1	4	5	5	1	5	32.3	145.9	0.29	15.2	14.6	-1.05	62.9	1	9	3	3	36	2	3	0	18	0	5	5	5	5	2	2	1	1	2	2	2	2	652.333	1	1	1
53	1-15-13-NE	2005-03-17	11.0833	37	2	2	1	3.1	1	1	1	5	4	4	1	6	32.8	140.1	-0.56	16.7	43.4	-0.17	58.6	1	11.6	5	3	41	1	3	0	26	0	2	2	2	2	1	2	3	1	2	2	2	2	1235.67	1	2	1
223	6-01-04-NE	2005-04-28	11.0833	36	2	2	1	3.2	1	1	1	5	4	4	1	4	54.75	158.6	1.18	21.8	96.3	1.79	74	5	19	8	3	40	1	1	0	25	0	7	3	5	5	2	3	5	3	1	1	1	2	2316	1	2	1
246	7-01-24-NE	2005-01-08	11.5	#NULL!	2	2	2	3.2	1	1	1	4	5	5	1	3	24.8	134.2	-1.71	13.8	0.7	-2.44	50.4	1	5.4	2	3	40	1	1	0	25	1	7	7	7	7	2	1	1	1	2	2	2	2	#NULL!	1	1	2
130	4-10-09-NE	2005-07-22	10.75	35	2	4	3	3.07	1	1	1	3	3	4	1	4	22.2	133.4	-1.3	12.5	0.2	-3.52	49.6	1	5	1	3	39	1	1	0	24	0	4	4	4	4	1	1	1	1	2	2	2	2	1433	1	2	2
166	4-03-12-NE	2005-08-08	10.8333	38	2	4	1	2.4	2	1	1	4	4	2	1	6	45.1	152.2	1.24	19.5	82.1	0.92	68.9	2	#NULL!	#NULL!	3	40	1	1	0	27	0	3	3	3	3	1	2	#NULL!	2	#NULL!	2	2	2	869	1	2	1
47	1-15-04-NE	2005-05-07	11	33	2	4	2	3.19	2	1	1	4	4	4	1	6	40.1	143.5	0.23	19.5	80.9	0.87	69.8	3	11.8	4	3	40	1	1	0	22	0	0	0	0	0	1	2	2	2	2	2	2	2	#NULL!	1	2	2
2	1-16-02-NE	2005-03-01	11.0833	35	2	1	2	2.69	2	1	1	4	4	5	1	6	28.35	145.95	0	13.3	0.6	-2.53	62.5	1	7.4	2	3	39	1	1	0	24	0	6	5	5.5	5.5	2	1	1	1	2	2	2	2	1600	1	1	2
340	8-03-49-NE	2005-09-27	10.75	44	2	3	2	3.318	2	1	1	5	5	6	1	6	61.5	148.3	0.68	28	99.7	2.76	85.2	6	28.5	9	3	40	1	3	0	33	0	2	3	2.5	2.5	1	4	5	3	1	1	1	1	1822	1	1	2
17	1-09-09-NE	2005-05-18	10.8333	35	2	2	2	2.682	1	1	1	3	5	4	1	6	26.7	143.9	0.21	12.9	0.2	-3.12	51.7	1	7.6	3	3	39	1	1	0	24	0	7	1	4	4	1	1	1	1	2	2	2	2	717	1	2	2
147	4-10-03-NE	2005-06-14	10.8333	48	2	2	3	3.3	1	1	1	5	5	5	1	4	28.3	133.45	1.37	15.9	27.9	-0.59	56.4	1	9.2	4	3	39	1	1	0	37	0	7	7	7	7	2	2	2	1	2	2	2	2	#NULL!	1	1	2
93	1-20-14-NE	2005-07-27	10.75	51	2	4	3	3.19	1	1	1	4	4	4	1	6	27	143.05	0.17	13.5	0.3	-2.77	54.7	1	5.2	1	3	40	1	1	0	40	0	0	0	0	0	1	1	1	1	2	2	2	2	#NULL!	1	2	2
341	8-03-73-NE	2005-05-02	11.1667	50	2	4	2	2.5	2	1	1	5	4	4	1	6	30	133.55	-1.92	16.8	39.2	-0.27	55.4	1	14.8	5	3	37	1	3	0	39	0	5	2	3.5	3.5	1	2	3	1	2	2	2	2	1368	1	2	2
144	4-03-08-NE	2005-06-02	10.8333	41	2	2	1	2.7	2	1	1	5	4	4	1	6	30.1	144	-0.02	14.5	6.8	-1.49	53.3	1	#NULL!	#NULL!	3	40	1	1	0	30	0	7	7	7	7	2	2	#NULL!	1	#NULL!	2	2	2	#NULL!	1	2	1
164	4-08-14-NE	2005-07-26	10.8333	32	2	4	1	2.64	2	1	1	5	4	4	1	6	70	158.5	2.24	27.9	99.7	2.75	92.6	6	#NULL!	#NULL!	3	#NULL!	1	1	0	21	0	2	2	2	2	1	4	#NULL!	3	#NULL!	1	1	1	#NULL!	1	2	1
5	1-14-02-NE	2005-01-07	11.25	46	2	4	3	2.01	2	1	1	4	8	5	1	6	37.95	152.3	0.65	16.4	28	-0.58	64.25	2	9	3	3	36	2	3	0	35	0	4	4	4	4	1	2	1	2	2	2	2	2	#NULL!	1	1	2
316	8-03-55-NE	2005-02-04	11.4167	40	2	4	2	2.73	2	1	1	4	4	7	1	6	34.9	147.2	-0.11	16.1	23.5	-0.72	58.4	1	14.2	5	3	41	1	1	0	29	0	4	3	3.5	3.5	1	2	3	1	2	2	2	2	1557	1	1	2
150	4-10-06-NE	2005-11-23	10.4167	37	2	2	3	3.5	1	1	1	5	4	5	1	6	27.1	133.6	-1.02	15.2	17.4	-0.94	54.9	1	6.4	3	3	38	1	1	1	26	0	2	2	2	2	1	2	1	1	2	2	2	2	#NULL!	1	1	2
207	6-01-06-NE	2005-06-22	10.9167	39	2	2	1	3.05	1	1	1	5	5	4	1	4	26.75	141.2	-0.27	13.4	0.5	-2.6	54.5	1	6.6	3	3	39	1	1	0	28	0	2	2	2	2	1	1	1	1	2	2	2	2	1916	1	2	1
394	1-12-05-NE	2005-12-20	10.3333	36	2	2	1	3.34	1	3	3	4	5	5	1	6	28.8	140.5	0.11	14.6	8.7	-1.36	60.3	1	15.1	7	3	40	1	1	0	25	0	4	4	4	4	1	2	4	1	1	2	2	2	#NULL!	2	1	1
78	1-03-04-NE	2005-05-10	10.9167	41	2	2	3	3.2	1	1	1	4	4	4	1	6	27.1	132.2	-1.62	15.5	19.4	-0.86	55.8	1	9.2	4	3	40	1	1	0	30	0	3	2	2.5	2.5	1	2	2	1	2	2	2	2	#NULL!	1	2	2
31	1-06-02-NE	2005-06-09	10.8333	39	2	1	1	2.03	1	2	4	4	4	3	1	6	31.45	140.25	-0.33	16	30.3	-0.51	60	1	8	4	3	36	2	1	0	28	0	7	7	7	7	2	2	2	1	2	2	2	2	#NULL!	2	2	1
303	8-03-43-NE	2005-10-20	10.75	32	2	2	1	3.29	1	1	1	3	5	3	1	3	64.6	142.1	0.05	32	99.8	3.83	84.3	6	27	9	3	39	1	1	0	21	1	4	2	3	3	1	4	5	3	1	1	1	1	1206	1	2	1
36	1-04-03-NE	2005-04-21	11	38	2	2	1	2.53	2	3	3	3	4	3	1	0	24.8	136.75	-1.26	13.3	0.6	-2.52	49.45	1	7.7	2	3	40	1	1	0	27	1	2	2	2	2	1	1	1	1	2	2	2	2	1372	2	2	1
330	8-03-53-NE	2005-12-13	10.5833	34	2	2	2	3.15	2	1	1	4	4	4	1	6	31	142.5	0	16.3	17.9	-0.92	54.6	1	11.4	4	3	40	1	1	0	23	0	5	5	5	5	2	2	2	1	2	2	2	2	2380	1	2	2
65	1-10-05-NE	2005-06-03	10.9167	33	2	2	2	3.1	2	1	1	3	3	4	1	3	33.7	135.6	-1.36	18.3	68.3	-0.48	62.9	1	12.2	4	3	38	1	3	0	22	1	7	7	7	7	2	2	2	1	2	2	2	2	838	1	2	2
129	4-01-08-NE	2005-05-08	11	43	2	2	6	2.37	2	1	1	4	4	4	1	6	27.7	137.3	-1.17	14.7	7.8	-1.42	55.2	1	9.8	3	3	37	1	1	0	32	0	7	7	7	7	2	2	1	1	2	2	2	2	1586	1	2	2
44	1-08-08-NE	2005-07-11	10.75	43	2	4	2	3.35	2	1	1	5	4	4	1	6	36.6	150.4	0.99	16.2	32	-0.47	58.6	1	11.4	4	3	39	1	1	0	32	0	3	2	2.5	2.5	1	2	2	1	2	2	2	2	1312	1	2	2
108	4-05-05-NE	2005-06-27	10.8333	40	2	1	1	2	1	1	1	4	4	4	1	6	25	134	-1.26	13.9	1.9	-2.08	61.6	1	#NULL!	#NULL!	3	40	1	1	0	29	0	5	6	5.5	5.5	2	1	#NULL!	1	#NULL!	2	2	2	2814	1	2	1
322	8-03-28-NE	2005-08-04	10.9167	34	2	2	1	2.9	2	4	5	5	4	4	1	6	23.2	129.5	-2.3	13.8	2.1	-2.03	49.7	1	8.8	3	3	38	1	1	0	23	0	7	7	7	7	2	1	1	1	2	2	2	2	1738	2	2	1
20	1-02-06-NE	2005-01-29	11.1667	40	2	4	2	2.9	2	3	3	3	3	3	1	6	38.65	154.95	1.13	16.3	29.3	-0.55	65.3	2	13	5	3	37	1	1	0	29	0	3	0	1.5	1.5	1	2	3	2	2	2	2	2	1082	2	2	2
7	1-13-05-NE	2005-08-04	10.6667	44	2	2	1	2.7	2	1	1	4	3	3	1	6	27.6	136.7	-0.96	14.8	10.4	-1.26	57.8	1	14.4	5	3	39	1	3	0	33	0	0	1	0.5	0.5	1	2	3	1	2	2	2	2	1635.33	1	2	1
310	8-03-57-NE	2005-06-25	11.0833	41	2	2	2	3.23	1	1	1	4	5	4	1	4	27.2	139.8	-0.55	13.9	1.6	-2.15	55.1	1	9.4	4	3	39	1	1	0	30	0	7	7	7	7	2	1	2	1	2	2	2	2	2363	1	2	2
332	8-03-62-NE	2005-09-13	10.8333	31	2	2	1	2.75	2	1	1	4	4	5	1	6	19.9	127.3	-2.54	12.3	0.2	-3.34	49.3	1	7	2	3	40	1	3	0	20	0	5	4	4.5	4.5	1	1	1	1	2	2	2	2	1391	1	1	1
202	5-03-06-NE	2005-06-25	10.9167	35	2	2	2	3.76	1	1	1	4	4	3	1	6	40.6	136.9	-0.9	21.7	96.5	1.81	67.1	2	18.4	8	3	40	1	1	1	24	0	7	3	5	5	2	3	5	2	1	1	2	2	1249	1	2	2
329	8-03-70-NE	2005-02-04	11.4167	33	2	2	1	2.05	1	1	1	5	4	4	1	3	30.8	147.9	0.31	14.1	1.6	-2.13	52.5	1	5.8	2	3	39	1	3	0	22	1	7	7	7	7	2	1	1	1	2	2	2	2	1276	1	2	1
366	2-05-05-NE	2005-02-28	11.4167	49	2	2	4	3	2	1	1	5	4	4	1	6	29.9	140.9	-1.01	15.1	9.3	-1.32	53.9	1	10.4	4	3	39	1	1	0	38	0	5	4	4.5	4.5	1	2	2	1	2	2	2	2	1899	1	2	2
8	1-13-06-NE	2005-09-23	10.5	39	2	3	2	2.84	2	1	1	5	4	4	1	6	46.3	142.7	0.56	21.8	95.3	1.68	72.9	4	17.4	7	3	39	1	1	0	28	0	4	4	4	4	1	3	4	2	1	1	2	2	1194	1	2	2
159	4-08-04-NE	2005-12-16	10.3333	42	2	4	2	2.62	2	1	1	4	4	5	1	6	23.4	138.8	-0.37	12.1	0.2	-3.33	49.3	1	#NULL!	#NULL!	3	#NULL!	1	1	0	31	0	6	5	5.5	5.5	2	1	#NULL!	1	#NULL!	2	2	2	#NULL!	1	1	2
208	5-10-09-NE	2005-11-20	10.5	36	2	4	1	2.98	1	1	1	4	4	3	1	6	52.45	147.1	0.97	24.2	99.4	2.51	78.6	6	27	9	3	#NULL!	1	1	0	25	0	7	3	5	5	2	4	5	3	1	1	1	1	#NULL!	1	2	1
162	4-08-13-NE	2005-07-26	10.8333	32	2	4	1	2.93	1	1	1	5	4	4	1	6	58	147.3	0.74	26.7	99.8	2.86	76.8	5	#NULL!	#NULL!	3	#NULL!	1	1	0	21	0	3	3	3	3	1	4	#NULL!	3	#NULL!	1	1	1	#NULL!	1	2	1
88	1-12-10-NE	2005-04-01	11.0833	35	2	4	1	2.3	2	1	1	4	4	4	1	6	24.2	136.5	-1.37	14.6	6.8	-1.52	49.7	1	7	2	3	39	1	3	0	24	0	7	7	7	7	2	2	1	1	2	2	2	2	1286	1	2	1
192	5-04-02-NE	2005-08-02	10.8333	44	2	2	2	2.5	2	1	1	4	4	4	1	6	27.95	134	-1.53	15.6	20.5	-0.8	52.5	1	11.2	4	3	38	1	3	0	33	0	0	2	1	1	1	2	2	1	2	2	2	2	2174	1	2	2
241	7-01-20-NE	2005-07-25	10.9167	43	2	2	1	2.5	1	1	1	4	4	4	1	4	27.65	139.45	-0.15	14.2	3.3	-1.84	52.6	1	14	6	3	40	1	1	0	32	0	4	4	4	4	1	2	4	1	1	2	2	2	#NULL!	1	2	1
146	4-03-06-NE	2006-01-31	10.25	29	2	4	1	2.9	2	1	1	4	4	4	1	6	28.3	140.4	-0.01	14.4	7.9	-1.41	53.8	1	#NULL!	#NULL!	3	40	1	1	0	18	0	4	4	4	4	1	2	#NULL!	1	#NULL!	2	2	2	#NULL!	1	2	1
165	4-03-09-NE	2005-11-07	10.5833	40	2	4	2	2.54	1	1	1	4	4	4	1	6	25.15	136.6	-0.64	13.5	0.8	-2.43	50.6	1	#NULL!	#NULL!	3	40	1	1	0	29	0	3	2	2.5	2.5	1	1	#NULL!	1	#NULL!	2	2	2	1028	1	2	2
25	1-02-07-NE	2005-07-16	10.6667	50	2	3	1	3	2	3	3	5	4	4	1	6	38.1	145	0.26	18.1	67.6	0.46	63.9	2	18.3	7	3	40	1	1	0	39	0	4	1	2.5	2.5	1	2	4	2	1	2	2	2	#NULL!	2	2	1
264	7-01-07-NE	2005-11-03	10.6667	37	2	1	2	3.025	2	1	1	5	4	4	1	6	35.2	140.35	-0.4	17.9	64.3	0.37	60.9	1	12.2	4	3	39	1	1	0	26	0	7	7	7	7	2	2	2	1	2	2	2	2	2380	1	2	2
364	2-05-04-NE	2005-09-22	10.8333	47	2	2	1	2.9	2	1	1	5	5	3	1	6	28.1	141.1	-0.45	14.1	3.8	-1.78	59.1	1	10.6	4	3	38	1	1	0	36	0	7	7	7	7	2	2	2	1	2	2	2	2	1905	1	2	1
66	1-10-04-NE	2005-08-08	10.75	39	2	4	2	3.68	1	1	1	4	4	6	1	6	35.5	135.7	-0.91	19.3	86.7	1.11	62.2	1	13.8	6	3	40	1	1	1	28	0	3	2	2.5	2.5	1	3	4	1	1	1	2	2	1910.67	1	1	2
134	4-07-02-NE	2005-05-22	10.9167	38	2	2	1	3.4	2	1	1	5	5	5	1	6	39.9	149.3	0.67	17.9	61.4	0.29	66.3	2	15.4	5	3	39	1	1	0	27	0	2	2	2	2	1	2	3	2	2	2	2	2	1618.67	1	1	1
304	8-03-59-NE	2005-02-24	11.3333	46	2	2	1	3.3	2	1	1	4	4	3	1	4	28.1	143.3	-0.46	13.9	1.1	-2.3	52	1	6.2	1	3	40	1	3	0	35	0	5	5	5	5	2	1	1	1	2	2	2	2	2007	1	2	1
363	2-04-07-NE	2005-07-01	10.6667	34	2	1	1	3.12	2	1	1	4	4	4	1	6	41.1	143.6	-0.29	19.9	84.1	1	68	2	14	5	3	40	1	1	0	23	0	3	3	3	3	1	3	3	2	2	1	2	2	1237	1	2	1
148	4-10-04-NE	2005-10-02	10.5833	34	2	2	1	3.32	2	1	4	4	4	3	1	4	33.9	144.6	0.32	16.2	35.1	-0.38	56.4	1	14.6	5	3	40	1	1	0	23	0	7	7	7	7	2	2	3	1	2	2	2	2	#NULL!	1	2	1
185	5-02-06-NE	2005-07-03	10.9167	39	2	1	2	2.88	2	1	1	5	5	5	1	6	25.7	134.85	-1.48	14.1	3.6	-1.79	50.3	1	7.2	2	3	38	1	1	0	28	0	1	1	1	1	1	2	1	1	2	2	2	2	1946	1	1	2
369	2-09-03-NE	2005-09-14	10.8333	42	2	4	1	2.6	1	1	1	4	4	3	1	6	35	142.7	0.04	17.2	56.5	0.16	57.9	1	17.2	7	3	40	1	2	0	31	0	6	4	5	5	2	2	4	1	1	2	2	2	1392	1	2	1
32	1-05-02-NE	2005-05-26	10.8333	34	2	1	3	3.2	1	1	1	4	5	5	1	4	34.4	144.3	0.28	16.5	42.3	-0.19	64.3	2	13.6	6	3	38	1	3	0	23	0	7	7	7	7	2	2	4	2	1	2	2	2	1671	1	1	2
128	4-01-07-NE	2005-10-07	10.5833	32	2	2	1	2.6	2	1	1	3	3	3	1	6	24.8	138.5	-0.61	13.4	1.3	-2.21	53	1	6	1	3	40	1	1	0	21	0	0	0	0	0	1	1	1	1	2	2	2	2	1302	1	2	1
199	6-01-03-NE	2005-12-29	10.4167	36	2	3	2	3.24	1	1	1	4	4	4	1	6	49.95	144.7	0.69	23.9	99.3	2.46	76.3	6	24.2	9	3	40	1	1	0	25	0	7	2	4.5	4.5	1	4	5	3	1	1	1	1	1985	1	2	2
342	8-03-74-NE	2005-09-24	10.8333	40	2	4	1	2.8	2	1	1	4	4	4	1	6	31.8	142.5	-0.22	15.7	22.7	-0.75	57.2	1	9	3	3	40	1	1	0	29	0	7	7	7	7	2	2	1	1	2	2	2	2	1467	1	2	1
90	1-23-03-NE	2005-10-08	10.5	53	2	1	3	3.4	2	1	1	5	5	4	1	6	30	143	0.11	14.7	9.9	-1.29	54.9	1	10.6	4	3	40	1	3	0	42	0	3	3	3	3	1	2	2	1	2	2	2	2	2150	1	2	2
194	5-08-03-NE	2005-10-05	10.6667	30	2	1	1	3.2	2	1	1	4	5	4	1	6	27.2	138.5	-0.69	14.2	4.8	-1.66	55.3	1	9.2	3	3	40	1	1	0	19	0	6	6	6	6	2	2	1	1	2	2	2	2	1856	1	2	1
35	1-04-02-NE	2005-10-19	10.5	43	2	2	1	2.15	2	1	1	3	4	2	1	6	33.7	133.7	-1.25	18.9	78.7	0.8	70.6	3	17.4	7	3	40	1	3	0	32	0	2	2	2	2	1	2	4	2	1	2	2	2	1329	1	2	1
335	8-03-33-NE	2005-11-03	10.6667	39	2	2	1	3.4	2	1	1	5	5	7	1	3	33.7	149.6	0.97	15.1	14	-1.08	60	1	14	5	3	40	1	2	0	28	1	4	3	3.5	3.5	1	2	3	1	2	2	2	2	1757	1	1	1
54	1-22-03-NE	2005-01-23	11.4167	32	2	2	1	3.35	1	4	4	4	4	5	1	5	25.4	142.8	-0.4	12.5	0.2	-3.71	50.4	1	6	2	3	40	1	1	0	21	0	3	3	3	3	1	1	1	1	2	2	2	2	1457	2	1	1
24	1-02-02-NE	2005-06-09	10.5833	44	2	3	2	2.64	1	2	5	3	2	4	1	4	29.6	142.3	0.22	14.6	8.1	-1.4	55.3	1	6.8	3	3	39	1	3	0	33	0	4	3	3.5	3.5	1	2	1	1	2	2	2	2	#NULL!	2	2	2
26	1-06-06-NE	2005-08-19	10.5833	34	2	2	1	2.95	2	2	2	3	4	4	1	6	53	141.8	-0.14	26.4	99.5	2.56	93.1	6	20	8	3	39	1	1	0	23	0	2	2	2	2	1	4	5	3	1	1	1	1	1302	2	2	1
320	8-03-45-NE	2005-05-18	11.1667	35	2	2	1	2.9	2	1	1	5	4	5	1	6	23.8	136.3	-1.47	12.8	0.1	-2.99	51.7	1	9.4	3	3	38	1	3	0	24	0	2	1	1.5	1.5	1	1	1	1	2	2	2	2	1091	1	1	1
251	7-01-10-NE	2005-03-18	11.25	34	2	4	1	3.25	2	1	1	4	4	5	1	6	34.35	149.4	0.36	15.4	14	-1.08	58.2	1	9	3	3	#NULL!	1	1	0	23	0	7	3	5	5	2	2	1	1	2	2	2	2	#NULL!	1	1	1
61	1-15-18-NE	2005-10-26	10.5	46	2	2	3	3.05	2	1	1	7	7	5	1	4	31	139	-0.47	16	32.6	-0.45	56.8	1	11.8	4	3	39	1	1	0	35	0	7	7	7	7	2	2	2	1	2	2	2	2	#NULL!	1	1	2
346	2-05-02-NE	2005-08-25	10.9167	42	2	2	1	2.8	2	1	1	4	5	4	1	6	22.3	131.9	-1.91	12.8	0.2	-2.89	52.1	1	8.4	3	3	38	1	3	0	31	0	7	7	7	7	2	1	1	1	2	2	2	2	2155	1	2	1
123	4-02-05-NE	2005-12-10	10.4167	34	2	4	1	3.035	1	1	1	4	4	4	1	6	24.1	134.95	-0.77	13.2	0.4	-2.62	54	1	#NULL!	#NULL!	3	#NULL!	1	1	0	23	0	7	7	7	7	2	1	#NULL!	1	#NULL!	2	2	2	#NULL!	1	2	1
138	4-08-07-NE	2005-07-13	10.8333	43	2	1	1	3.62	2	1	1	4	4	6	1	6	25.4	135.6	-1.26	13.8	2.3	-2	53	1	6.8	1	3	40	1	3	1	32	0	7	7	7	7	2	1	1	1	2	2	2	2	1841	1	1	1
257	7-01-03-NE	2005-12-10	10.5833	38	2	2	2	3.2	2	1	1	3	3	4	1	4	28.2	139.5	-0.42	14	3.6	-1.79	53.5	1	10.4	4	3	40	1	1	0	27	0	7	3	5	5	2	2	2	1	2	2	2	2	2002	1	2	2
